# Supplementary material for: Comprehensive insights into the structure and coordination behavior of thiosemicarbazone ligands: a computational assessment of the E–Z interconversion mechanism during coordination
Source: Royal Society of Chemistry journal article supplement (doi:10.1039/c5nj02041g), 2015-01-01
Supplement: c5nj02041g1.pdf [file c5nj02041g1.pdf]

# Comprehensive Insights into the Structure and Coordination Behaviour of Thiosemicarbazone Ligands: A Computational Assessment on E-Z Interconversion Mechanism during Coordination

M. Hossein Khalilian,<sup>a</sup> Saber Mirzaei<sup>a</sup> and Avat (Arman) Taherpour<sup>\*ab</sup>

<sup>a</sup>Faculty of Chemistry, Razi University, P.O. Box: 67149-67346, Kermanshah, Iran

<sup>b</sup>Medical Biology Research Centre, Kermanshah University of Medical Sciences, Kermanshah, Iran

## ELECTRONIC SUPPLEMENTARY INFORMATION

### Table of contents

|                                                        |              |
|--------------------------------------------------------|--------------|
| Atom numbering assignment of ATSC                      | Page S1      |
| Parameters for ATSC                                    | Page S1-S2   |
| Effects of bulky substituents on stability             | Page S3      |
| Tautomerization mechanism (route 1-second sequence)    | Page S4      |
| Tautomerization mechanism (route 2)                    | Page S5      |
| Influence of protic solvent (methanol) on inversion TS | Page S6      |
| Optimized coordinates (Z-matrix) for tautomers         | Page S7-S10  |
| Optimized coordinates for mechanism investigations     | Page S11-S62 |

**Figure S1.** Atom numbering assignment of acetaldehyde thiosemicarbazone (ATSC)

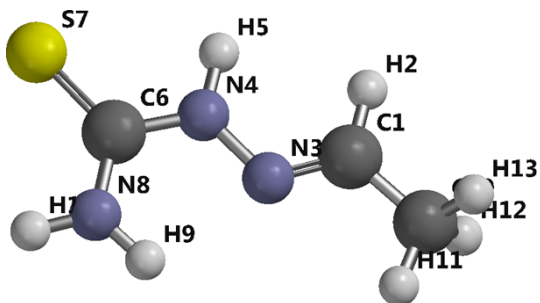

**Table S1.** Complete parameters for most stable thione form.

| Parameters | Bond Length |       | Bond Angle  |        | Torsion Angle |         |
|------------|-------------|-------|-------------|--------|---------------|---------|
|            |             |       |             |        |               |         |
|            | R(1,2)      | 1.095 | A(2,1,3)    | 120.65 | D(2,1,3,4)    | -0.00   |
|            | R(1,3)      | 1.274 | A(2,1,10)   | 118.02 | D(10,1,3,4)   | 180.00  |
|            | R(1,10)     | 1.491 | A(3,1,10)   | 121.32 | D(2,1,10,11)  | -179.99 |
|            | R(3,4)      | 1.361 | A(1,3,4)    | 118.04 | D(2,1,10,12)  | -59.14  |
|            | R(4,5)      | 1.014 | A(3,4,5)    | 121.76 | D(2,1,10,13)  | 59.14   |
|            | R(4,6)      | 1.367 | A(3,4,6)    | 121.92 | D(3,1,10,11)  | 0.0     |
|            | R(6,7)      | 1.673 | A(5,4,6)    | 116.30 | D(3,1,10,12)  | 120.85  |
|            | R(6,8)      | 1.344 | A(4,6,7)    | 120.17 | D(3,1,10,13)  | -120.85 |
|            | R(8,9)      | 1.008 | A(4,6,8)    | 115.35 | D(1,3,4,5)    | -0.00   |
|            | R(8,14)     | 1.004 | A(7,6,8)    | 124.47 | D(1,3,4,6)    | -179.99 |
|            | R(10,11)    | 1.089 | A(6,8,9)    | 120.39 | D(3,4,6,7)    | 179.99  |
|            | R(10,12)    | 1.094 | A(6,8,14)   | 118.16 | D(3,4,6,8)    | -0.01   |
|            | R(10,13)    | 1.094 | A(9,8,14)   | 121.43 | D(5,4,6,7)    | 0.00    |
|            |             |       | A(1,10,11)  | 110.61 | D(5,4,6,8)    | 179.99  |
|            |             |       | A(1,10,12)  | 110.69 | D(4,6,8,9)    | 0.02    |
|            |             |       | A(1,10,13)  | 110.69 | D(4,6,8,14)   | 179.98  |
|            |             |       | A(11,10,12) | 108.94 | D(7,6,8,9)    | -179.97 |
|            |             |       | A(11,10,13) | 108.94 | D(7,6,8,14)   | -0.02   |
|            |             |       | A(12,10,13) | 106.85 |               |         |

Table S1 (continued). Selected parameters compared to other TSCs.

|                       | R(C1-N2)     | R(N2-N3)     | R(N3-C4)     | R(C4-S6)     | R(C4-N5)     | A(C1-N2-N3)  | A(N2-N3-C4)  | A(N3-C4-N5)  | A(N3-C4-S6)  | A(N5-C4-S6)  |
|-----------------------|--------------|--------------|--------------|--------------|--------------|--------------|--------------|--------------|--------------|--------------|
| <b>Model compound</b> | <b>1.275</b> | <b>1.362</b> | <b>1.367</b> | <b>1.673</b> | <b>1.344</b> | <b>118.0</b> | <b>121.9</b> | <b>115.3</b> | <b>120.1</b> | <b>124.4</b> |
| <i>TSC1</i>           | 1.286        | 1.398        | 1.342        | 1.690        | 1.334        | 116.6        | 117.6        | 117.8        | 119.3        | 122.8        |
| <i>TSC2</i>           | 1.275        | 1.365        | 1.354        | 1.678        | 1.329        | 116.8        | 119.3        | 116.6        | 119.8        | 123.6        |
| <i>TSC3</i>           | 1.2837       | 1.3783       | 1.3587       | 1.6849       | 1.3401       | 114.37       | 120.47       | -            | -            | -            |
| <i>TSC4</i>           | 1.2894       | 1.3846       | 1.3642       | 1.6773       | 1.3427       | 118.38       | 117.35       | 114.44       | 120.06       | 125.48       |
| <i>TSC5</i>           | 1.299        | 1.352        | 1.367        | 1.675        | 1.330        | 116.8        | 120.2        | 116.4        | 118.4        | 125.1        |
| <i>TSC6</i>           | 1.2826       | 1.3815       | 1.3417       | 1.6964       | 1.3335       | 116.20       | 118.53       | 117.16       | 120.78       | 122.05       |

TSC1: Acetone Thiosemicarbazone (Palenic et al., 1974)

TSC2: 4-Formylpyridine Thiosemicarbazone (Restivo et al., 1970)

TSC3: Pyridine-2-carbaldehyde N4-phenethylthiosemicarbazone (Fun et al., 2005)

TSC4: N-Phenyl-2-(1,2,3,4-tetrahydronaphthalen-1-ylidene)hydrazinecarbothioamide (Oliveira et al., 2014)

TSC5: 1-(5-Bromo-2-oxoindolin-3-ylidene) Thiosemicarbazone (Bandeira et al., 2013)

TSC6: (E)-4-(Benzyloxy)benzaldehyde Thiosemicarbazone (Tarafer et al., 2008)

\* The little difference of the calculated and experimental data is owe to the hydrogen bond involve with thione S atom in solid (X-ray crystal) form.

**Table S2.** Effects of alkyl & aryl N8-substituents on thiosemicarbazone rotamers (Effects of bulky substituents on stability). Calculated at B3LYP/6-31+G\* level.

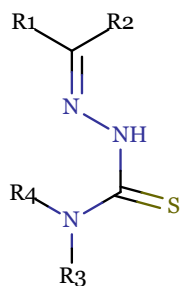

*E(Z)-Trans configuration*

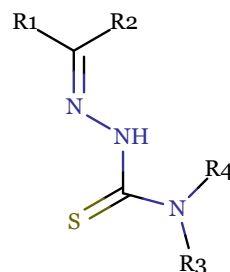

*E(Z)-Cis configuration*

| Substituents    |    |                 |                 | Energy (kcal.mol <sup>-1</sup> ) |        | Substituents |                 |                 |                 | Energy (kcal.mol <sup>-1</sup> ) |        |
|-----------------|----|-----------------|-----------------|----------------------------------|--------|--------------|-----------------|-----------------|-----------------|----------------------------------|--------|
| R1              | R2 | R3              | R4              | E-trans                          | E-cis  | R1           | R2              | R3              | R4              | Z-trans                          | Z-cis  |
| CH <sub>3</sub> | H  | H               | H               | 0                                | 10.023 | H            | CH <sub>3</sub> | H               | H               | 0                                | 10.864 |
| CH <sub>3</sub> | H  | CH <sub>3</sub> | H               | 0                                | 10.534 | H            | CH <sub>3</sub> | CH <sub>3</sub> | H               | 0                                | 11.429 |
| CH <sub>3</sub> | H  | Ph              | H               | 0                                | 10.750 | H            | CH <sub>3</sub> | Ph              | H               | 0                                | 11.797 |
| CH <sub>3</sub> | H  | T-Bu            | H               | 0                                | 10.939 | H            | CH <sub>3</sub> | T-Bu            | H               | 0                                | 11.992 |
| CH <sub>3</sub> | H  | H               | CH <sub>3</sub> | 0                                | 4.045  | H            | CH <sub>3</sub> | H               | CH <sub>3</sub> | 0                                | 4.829  |
| CH <sub>3</sub> | H  | H               | T-Bu            | 0                                | 2.994  | H            | CH <sub>3</sub> | H               | T-Bu            | 0                                | 5.074  |
| CH <sub>3</sub> | H  | CH <sub>3</sub> | CH <sub>3</sub> | 0                                | 5.090  | H            | CH <sub>3</sub> | CH <sub>3</sub> | CH <sub>3</sub> | 0                                | 5.835  |
| CH <sub>3</sub> | H  | Ph              | Ph              | 0                                | 3.320  | H            | CH <sub>3</sub> | Ph              | Ph              | 0                                | 4.571  |
| CH <sub>3</sub> | H  | T-Bu            | T-Bu            | 0                                | 1.486  | H            | CH <sub>3</sub> | T-Bu            | T-Bu            | 0                                | 2.349  |

**Figure S2.** The route 1 (second sequence) for E-Z interconversion through tautomerization mechanism

A. 2D Sketch

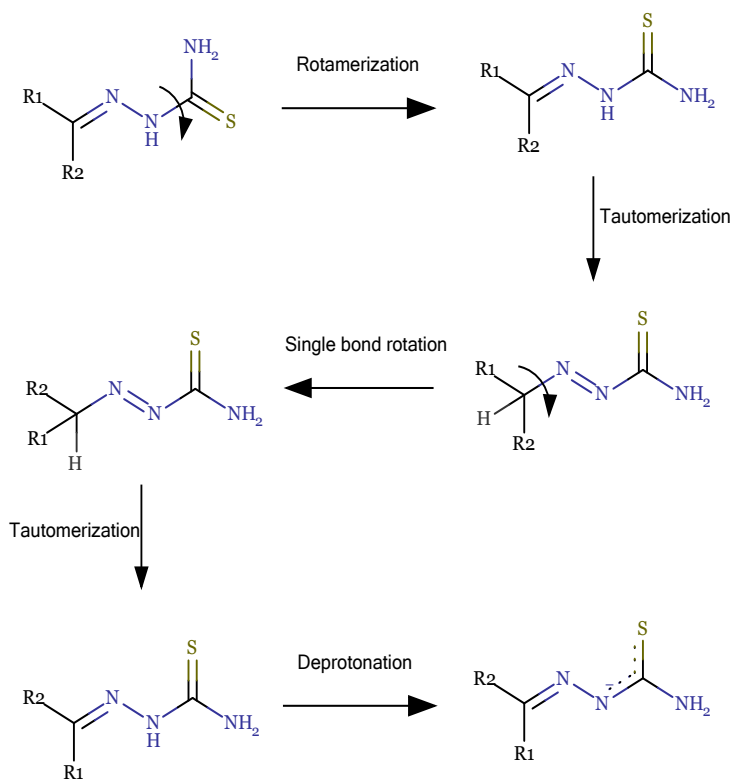

B) 3D sketch of rate determining step of tautomerization (overall free energy). Calculated at B3LYP/6-311++G(2d,p) and B3LYP/6-31+G\*.

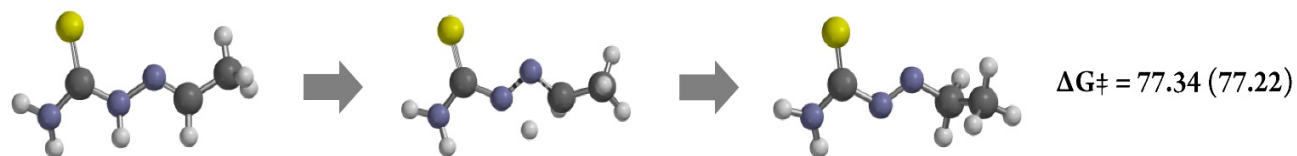

**Figure S3.** The route 2 for E-Z interconversion through tautomerization mechanism (This mechanism is valid on the condition that the R  $\neq$  quaternary carbon atom).

A) 2D scheme

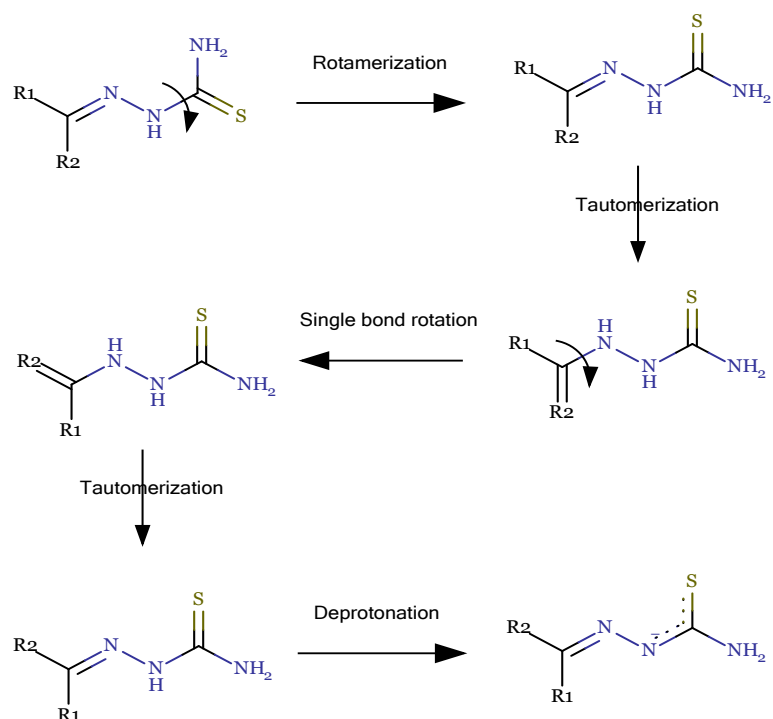

B) 3D sketch of rate determining step of tautomerization (overall free energy). Calculated at B3LYP/6-311++G(2d,p) and B3LYP/6-31+G\*

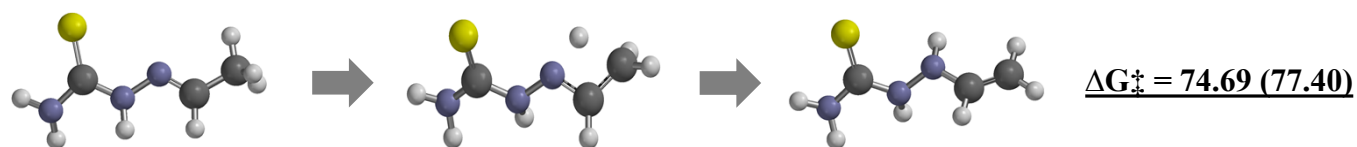

**Figure S4.** Influence of protic solvent (methanol) on inversion TS.

The minimum structure as well as transition state of ATSC inversion were treated by hybrid solvation. Two methanol molecule were utilize for microsolvation and both structures (minima and TS) were optimized by employing CPCM continuum model at B3LYP/6-311++G(2d,p) // B3LYP/6-31+G(d) level .



Electronic Energy E(B3LYP): -681.08300316  
Zero-point correction= 0.109444 (Hartree/Particle)  
Thermal correction to Energy= 0.117883  
Thermal correction to Enthalpy= 0.118828  
Thermal correction to Gibbs Free Energy= 0.076108

|   |             |             |             |
|---|-------------|-------------|-------------|
| C | -2.27236900 | -0.55362800 | 0.00005000  |
| H | -2.19704400 | -1.64677400 | 0.00002200  |
| N | -1.22309400 | 0.17002200  | 0.00000600  |
| N | -0.01373200 | -0.45592300 | -0.00007200 |
| H | 0.06409300  | -1.46760900 | 0.00000600  |
| C | 1.16159400  | 0.24214500  | -0.00006400 |
| S | 2.62362300  | -0.57234500 | 0.00002200  |
| N | 1.03610700  | 1.58031100  | -0.00018700 |
| H | 0.12220700  | 2.00726500  | 0.00008700  |
| C | -3.63358600 | 0.05481600  | 0.00013500  |
| H | -3.56771000 | 1.14222700  | 0.00015000  |
| H | -4.20097800 | -0.26672000 | -0.87882500 |
| H | -4.20088500 | -0.26675200 | 0.87914300  |
| H | 1.87354200  | 2.13501300  | 0.00012000  |

### Tautomer 1 (methanol-CPCM)

Electronic Energy E(B3LYP): -681.10001719  
Zero-point correction= 0.109339 (Hartree/Particle)  
Thermal correction to Energy= 0.117710  
Thermal correction to Enthalpy= 0.118654  
Thermal correction to Gibbs Free Energy= 0.076226

|   |             |             |             |
|---|-------------|-------------|-------------|
| C | 2.27076600  | -0.54599900 | -0.00032500 |
| H | 2.18258000  | -1.63588200 | -0.00101400 |
| N | 1.23095500  | 0.19235800  | 0.00033900  |
| N | 0.01553000  | -0.44875900 | 0.00032600  |
| H | -0.04017500 | -1.46197100 | -0.00026600 |
| C | -1.14174700 | 0.24766300  | 0.00012200  |
| S | -2.63185900 | -0.58099000 | -0.00001800 |
| N | -1.04584500 | 1.57808000  | 0.00006500  |
| H | -0.14009500 | 2.02532300  | -0.00014900 |



|   |             |             |             |
|---|-------------|-------------|-------------|
| C | 3.63770500  | 0.04104500  | -0.00022700 |
| H | 3.59994800  | 1.12959300  | -0.00075400 |
| H | 4.19300400  | -0.30137300 | 0.87799600  |
| H | 4.19358200  | -0.30226300 | -0.87772000 |
| H | -1.88392500 | 2.13441000  | -0.00032100 |

### Tautomer 2 (*vacuo*)

|                                          |                             |
|------------------------------------------|-----------------------------|
| Electronic Energy E(B3LYP):              | -681.06533092               |
| Zero-point correction=                   | 0.105998 (Hartree/Particle) |
| Thermal correction to Energy=            | 0.114395                    |
| Thermal correction to Enthalpy=          | 0.115339                    |
| Thermal correction to Gibbs Free Energy= | 0.073032                    |

|   |             |             |             |
|---|-------------|-------------|-------------|
| C | -2.19944500 | -0.50349500 | 0.00157400  |
| N | -1.02761600 | -0.00250800 | -0.00835100 |
| N | -0.00195500 | -0.93343400 | -0.01929000 |
| C | 1.18782400  | -0.44226300 | 0.00157300  |
| N | 2.25919100  | -1.29493700 | 0.07424600  |
| S | 1.62434400  | 1.28691800  | 0.00695200  |
| H | -2.32422300 | -1.58929900 | 0.00819800  |
| H | 3.13311100  | -0.97502400 | -0.31436000 |
| H | 2.03358900  | -2.26324500 | -0.10787900 |
| H | 0.32459600  | 1.64420300  | -0.08670300 |
| C | -3.41418900 | 0.36056600  | 0.00456500  |
| H | -4.03916900 | 0.14821900  | -0.86900100 |
| H | -4.02835200 | 0.15629200  | 0.88762200  |
| H | -3.14153300 | 1.41548000  | -0.00160600 |

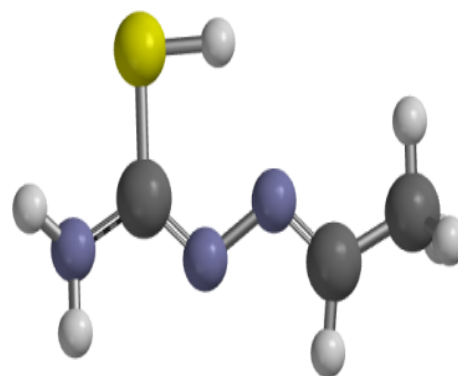

### Tautomer 2 (methanol-CPCM)

|                                          |                             |
|------------------------------------------|-----------------------------|
| Electronic Energy E(B3LYP):              | -681.07590571               |
| Zero-point correction=                   | 0.105389 (Hartree/Particle) |
| Thermal correction to Energy=            | 0.113879                    |
| Thermal correction to Enthalpy=          | 0.114824                    |
| Thermal correction to Gibbs Free Energy= | 0.072296                    |

|   |            |             |             |
|---|------------|-------------|-------------|
| C | 2.20506200 | -0.50207900 | 0.00603500  |
| N | 1.03034300 | -0.00326200 | -0.00511900 |

|   |             |             |             |
|---|-------------|-------------|-------------|
| N | 0.00094900  | -0.93791400 | 0.01118900  |
| C | -1.19437800 | -0.44753400 | -0.00101400 |
| N | -2.26770500 | -1.28786100 | -0.07164100 |
| S | -1.62193800 | 1.28717700  | -0.00174700 |
| H | 2.33721600  | -1.58656300 | 0.02239700  |
| H | -3.15070700 | -0.95566300 | 0.28831100  |
| H | -2.07200300 | -2.26057700 | 0.12571700  |
| H | -0.32504400 | 1.65677100  | 0.05049200  |
| C | 3.42018800  | 0.35870400  | -0.00268700 |
| H | 4.03429200  | 0.15488400  | 0.88001100  |
| H | 4.04014400  | 0.12906400  | -0.87487200 |
| H | 3.15676900  | 1.41596300  | -0.01912000 |

### Tautomer 3 (*vacuo*)

|                                          |                             |
|------------------------------------------|-----------------------------|
| Electronic Energy E(B3LYP):              | -681.06203760               |
| Zero-point correction=                   | 0.110291 (Hartree/Particle) |
| Thermal correction to Energy=            | 0.118646                    |
| Thermal correction to Enthalpy=          | 0.119590                    |
| Thermal correction to Gibbs Free Energy= | 0.076305                    |

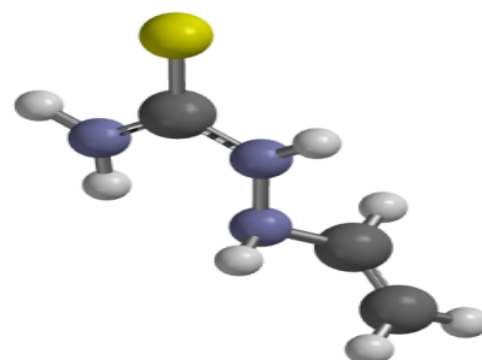

|   |             |             |             |
|---|-------------|-------------|-------------|
| C | -2.31973200 | -0.17006000 | -0.42627000 |
| N | -1.27027800 | 0.19846300  | 0.43467200  |
| N | -0.05700500 | -0.45919700 | 0.22673000  |
| C | 1.11289700  | 0.21675400  | 0.02242000  |
| S | 2.56364900  | -0.61161800 | -0.07779900 |
| N | 0.99820000  | 1.55291200  | -0.08922800 |
| C | -3.60047500 | -0.24897700 | -0.07679600 |
| H | -1.98818200 | -0.33914500 | -1.44428800 |
| H | -1.53212400 | 0.21911400  | 1.41608500  |
| H | 0.02041500  | -1.45402700 | 0.39553200  |
| H | 1.82677400  | 2.08153500  | -0.29784800 |
| H | 0.08999800  | 1.99181000  | -0.06800100 |
| H | -3.93190600 | -0.09210700 | 0.94358700  |
| H | -4.35591500 | -0.45283700 | -0.82160800 |

### Tautomer 3 (methanol-CPCM)

Electronic Energy E(B3LYP): -681.08082847  
Zero-point correction= 0.110224 (Hartree/Particle)  
Thermal correction to Energy= 0.118470  
Thermal correction to Enthalpy= 0.119414  
Thermal correction to Gibbs Free Energy= 0.076875

|   |             |             |             |
|---|-------------|-------------|-------------|
| C | -2.29390700 | -0.18846700 | -0.42696900 |
| N | -1.27426600 | 0.18701800  | 0.46515500  |
| N | -0.05052000 | -0.45937100 | 0.28940100  |
| C | 1.08440800  | 0.22722400  | 0.03400200  |
| S | 2.56798700  | -0.60370600 | -0.09809500 |
| N | 0.97605100  | 1.54762600  | -0.10836900 |
| C | -3.58866700 | -0.24076700 | -0.12076100 |
| H | -1.93130500 | -0.38194400 | -1.43004200 |
| H | -1.55287300 | 0.19874200  | 1.44165800  |
| H | 0.02246500  | -1.45594900 | 0.45121200  |
| H | 1.79682600  | 2.09279800  | -0.31114800 |
| H | 0.07612600  | 1.99840900  | -0.01670600 |
| H | -3.95128200 | -0.05563200 | 0.88404500  |
| H | -4.31760200 | -0.45198200 | -0.89044100 |

### Tautomer 4 (*vacuo*)

Electronic Energy E(B3LYP): -681.05198666  
Zero-point correction= 0.105552 (Hartree/Particle)  
Thermal correction to Energy= 0.114256  
Thermal correction to Enthalpy= 0.115200  
Thermal correction to Gibbs Free Energy= 0.071774

|   |             |             |             |
|---|-------------|-------------|-------------|
| C | 2.29796800  | -0.54154400 | 0.03058900  |
| N | 1.27256100  | 0.20350000  | -0.08053100 |
| N | 0.04600500  | -0.39055300 | -0.10605000 |
| C | -1.08889400 | 0.40735000  | -0.01245100 |
| N | -1.15500000 | 1.66833200  | 0.02104300  |
| S | -2.57038400 | -0.61148300 | 0.00828900  |
| H | 2.19636400  | -1.63069900 | 0.11678700  |

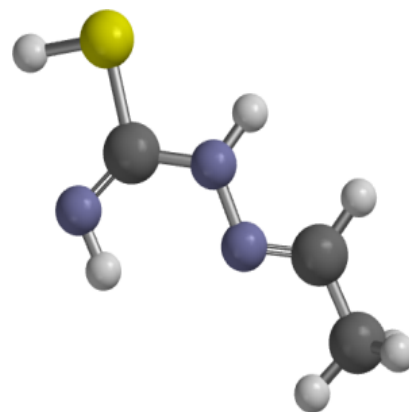

|   |             |             |             |
|---|-------------|-------------|-------------|
| H | -0.02847600 | -1.37335500 | 0.13768100  |
| H | -0.22021800 | 2.07780800  | 0.01396500  |
| H | -3.37066500 | 0.43240900  | 0.27183400  |
| C | 3.67477700  | 0.03281000  | 0.04082600  |
| H | 4.27024100  | -0.37608000 | -0.78153400 |
| H | 3.63603100  | 1.11720000  | -0.05530800 |
| H | 4.19480500  | -0.22420200 | 0.96892500  |

### Tautomer 4 (methanol-CPCM)

|                                          |                             |
|------------------------------------------|-----------------------------|
| Electronic Energy E(B3LYP):              | -681.06582326               |
| Zero-point correction=                   | 0.105248 (Hartree/Particle) |
| Thermal correction to Energy=            | 0.114066                    |
| Thermal correction to Enthalpy=          | 0.115010                    |
| Thermal correction to Gibbs Free Energy= | 0.071136                    |

|   |             |             |             |
|---|-------------|-------------|-------------|
| C | 2.29545000  | -0.53533600 | 0.01866900  |
| N | 1.27470900  | 0.22602100  | -0.04108700 |
| N | 0.04367900  | -0.37712000 | -0.04261200 |
| C | -1.08790600 | 0.39803500  | -0.00244300 |
| N | -1.15649800 | 1.67170600  | 0.01114100  |
| S | -2.56953300 | -0.61678300 | -0.00095500 |
| H | 2.18266900  | -1.62228100 | 0.07340500  |
| H | -0.01935200 | -1.38333300 | 0.07289300  |
| H | -0.21520800 | 2.06771000  | 0.01556300  |
| H | -3.39694500 | 0.42978400  | 0.13975300  |
| C | 3.67761900  | 0.01916200  | 0.01398100  |
| H | 4.24156300  | -0.37927400 | -0.83468900 |
| H | 3.66466400  | 1.10700600  | -0.04398500 |
| H | 4.21092100  | -0.28649400 | 0.91900500  |

### Tautomer 5 (*vacuo*)

|                                 |                             |
|---------------------------------|-----------------------------|
| Electronic Energy E(B3LYP):     | -681.05425348               |
| Zero-point correction=          | 0.109321 (Hartree/Particle) |
| Thermal correction to Energy=   | 0.117561                    |
| Thermal correction to Enthalpy= | 0.118505                    |

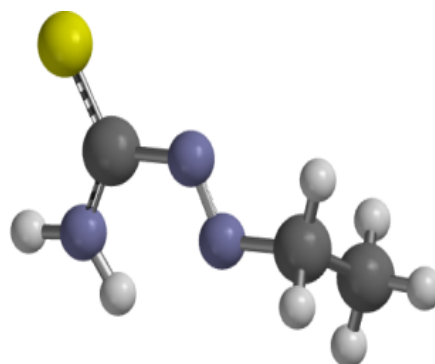

Thermal correction to Gibbs Free Energy= 0.075350

|   |             |             |             |
|---|-------------|-------------|-------------|
| C | 2.33650800  | -0.42555100 | -0.50575200 |
| N | 1.06651100  | 0.28073800  | -0.32354100 |
| N | 0.08890100  | -0.47242300 | -0.21098400 |
| C | -1.17152900 | 0.23614000  | -0.02091400 |
| N | -1.10232100 | 1.57042900  | -0.01066500 |
| S | -2.53423200 | -0.67068100 | 0.15884500  |
| H | 2.16008800  | -1.50233800 | -0.56618700 |
| H | 2.74015100  | -0.07247700 | -1.46011700 |
| H | -1.94005600 | 2.11186200  | 0.11806900  |
| H | -0.19979800 | 2.01252800  | -0.12706500 |
| C | 3.29893700  | -0.06555100 | 0.62496100  |
| H | 4.26719900  | -0.53739600 | 0.44908700  |
| H | 3.44807000  | 1.01379600  | 0.68604500  |
| H | 2.91692300  | -0.41650800 | 1.58519900  |

### Tautomer 5 (methanol-CPCM)

Electronic Energy E(B3LYP): -681.06741305  
Zero-point correction= 0.109043 (Hartree/Particle)  
Thermal correction to Energy= 0.117274  
Thermal correction to Enthalpy= 0.118218  
Thermal correction to Gibbs Free Energy= 0.074668

|   |             |             |             |
|---|-------------|-------------|-------------|
| C | 2.33972500  | -0.43068000 | -0.50158300 |
| N | 1.07106900  | 0.27028800  | -0.31466500 |
| N | 0.08619000  | -0.47264000 | -0.21450500 |
| C | -1.16944800 | 0.25160000  | -0.02318900 |
| N | -1.10617400 | 1.57001300  | -0.01453500 |
| S | -2.54093000 | -0.67380900 | 0.16040000  |
| H | 2.17358700  | -1.50888000 | -0.56132700 |
| H | 2.73349000  | -0.07254400 | -1.45772400 |
| H | -1.93666300 | 2.12690100  | 0.11398900  |
| H | -0.20590900 | 2.02116300  | -0.12995900 |
| C | 3.30776900  | -0.06039000 | 0.62158300  |
| H | 4.27244200  | -0.53418800 | 0.43471300  |
| H | 3.45715900  | 1.01916300  | 0.67218500  |

|   |            |             |            |
|---|------------|-------------|------------|
| H | 2.93491900 | -0.40747200 | 1.58679100 |
|---|------------|-------------|------------|

### Tautomer 6 (*vacuo*)

|                                          |                             |
|------------------------------------------|-----------------------------|
| Electronic Energy E(B3LYP):              | -681.04016820               |
| Zero-point correction=                   | 0.106275 (Hartree/Particle) |
| Thermal correction to Energy=            | 0.114977                    |
| Thermal correction to Enthalpy=          | 0.115921                    |
| Thermal correction to Gibbs Free Energy= | 0.072364                    |

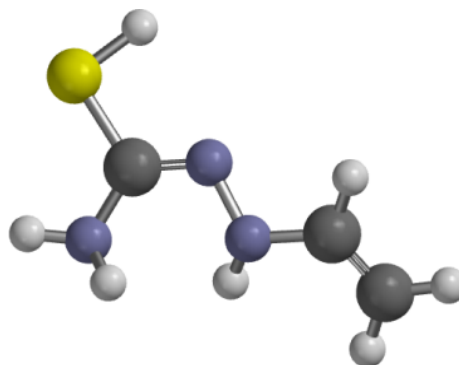

|   |             |             |             |
|---|-------------|-------------|-------------|
| C | 2.44826900  | -0.50532800 | -0.19382600 |
| N | 1.28332000  | 0.25747800  | -0.12900300 |
| N | 0.09105200  | -0.48279900 | -0.08153000 |
| C | -0.97189700 | 0.22109500  | -0.02508800 |
| S | -2.56370600 | -0.57527200 | 0.07302700  |
| N | -1.00559100 | 1.60958500  | 0.00463800  |
| C | 3.65231000  | -0.11558800 | 0.22548000  |
| H | 2.29379000  | -1.46096200 | -0.67958300 |
| H | 1.31838100  | 1.01573900  | 0.54887000  |
| H | -2.05087500 | -1.79848500 | 0.27986600  |
| H | -1.91672400 | 2.03171100  | -0.10264600 |
| H | -0.30707700 | 2.03684900  | -0.59508400 |
| H | 3.81536700  | 0.83660100  | 0.71780500  |
| H | 4.51286400  | -0.74803500 | 0.06420800  |

### Tautomer 6 (methanol-CPCM)

|                                          |                             |
|------------------------------------------|-----------------------------|
| Electronic Energy E(B3LYP):              | -681.05290875               |
| Zero-point correction=                   | 0.106015 (Hartree/Particle) |
| Thermal correction to Energy=            | 0.114651                    |
| Thermal correction to Enthalpy=          | 0.115595                    |
| Thermal correction to Gibbs Free Energy= | 0.072535                    |

|   |             |             |             |
|---|-------------|-------------|-------------|
| C | 2.45127400  | -0.51020600 | -0.18107200 |
| N | 1.29011800  | 0.25370600  | -0.14676200 |
| N | 0.09162400  | -0.48222300 | -0.09199900 |
| C | -0.97389900 | 0.22723300  | -0.02953000 |
| S | -2.56376200 | -0.57745800 | 0.07538600  |

|   |             |             |             |
|---|-------------|-------------|-------------|
| N | -1.01864800 | 1.60500800  | 0.01220500  |
| C | 3.65869300  | -0.10986000 | 0.22985100  |
| H | 2.30322300  | -1.48229900 | -0.63719100 |
| H | 1.32338300  | 1.04541000  | 0.49188100  |
| H | -2.06287800 | -1.80616100 | 0.27875900  |
| H | -1.92891400 | 2.02962900  | -0.10111000 |
| H | -0.31039700 | 2.06886700  | -0.54668800 |
| H | 3.82149100  | 0.85749200  | 0.69179900  |
| H | 4.51621700  | -0.75204900 | 0.08677100  |

### Tautomer 7 (*vacuo*)

|                                          |                             |
|------------------------------------------|-----------------------------|
| Electronic Energy E(B3LYP):              | -681.03819522               |
| Zero-point correction=                   | 0.106153 (Hartree/Particle) |
| Thermal correction to Energy=            | 0.114371                    |
| Thermal correction to Enthalpy=          | 0.115316                    |
| Thermal correction to Gibbs Free Energy= | 0.072629                    |

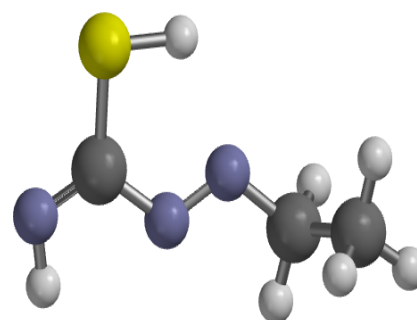

|   |             |             |             |
|---|-------------|-------------|-------------|
| N | 2.10302000  | 1.47132300  | 0.27275000  |
| C | 1.28946500  | 0.52647200  | 0.06116200  |
| N | -0.11734700 | 0.85215700  | -0.12224100 |
| N | -0.87785200 | -0.09569800 | -0.32567800 |
| S | 1.86421600  | -1.14766600 | -0.00778400 |
| C | -2.28275300 | 0.28800300  | -0.49562900 |
| H | 1.59766100  | 2.36045200  | 0.27884000  |
| H | 0.63768000  | -1.65510200 | -0.24282200 |
| H | -2.38430000 | 1.37582200  | -0.46108500 |
| H | -2.56722900 | -0.06841600 | -1.49048900 |
| C | -3.13868000 | -0.40249500 | 0.56448900  |
| H | -4.19204500 | -0.17561800 | 0.39207500  |
| H | -3.00889900 | -1.48518600 | 0.52943700  |
| H | -2.87327000 | -0.05565800 | 1.56463500  |

### Tautomer 7 (methanol-CPCM)

|                                 |                             |
|---------------------------------|-----------------------------|
| Electronic Energy E(B3LYP):     | -681.04714595               |
| Zero-point correction=          | 0.105692 (Hartree/Particle) |
| Thermal correction to Energy=   | 0.113956                    |
| Thermal correction to Enthalpy= | 0.114900                    |





H 0.18528900 2.04820900 -0.11445600

### Tautomer 8 (methanol-CPCM)

Electronic Energy E(B3LYP): -681.04807018  
Zero-point correction= 0.106599 (Hartree/Particle)  
Thermal correction to Energy= 0.114991  
Thermal correction to Enthalpy= 0.115935  
Thermal correction to Gibbs Free Energy= 0.073183

C -3.65321800 -0.22865800 -0.01870700  
C -2.37704500 -0.22740200 -0.40579400  
N -1.30228300 0.22177400 0.36836600  
N -0.08307600 -0.42083000 0.14297000  
C 1.04112700 0.37235900 -0.00218300  
S 2.53104200 -0.62800300 -0.03669900  
N 1.08256100 1.63518400 -0.15112900  
H -4.42857100 -0.50803000 -0.71805800  
H -3.95355700 0.06783800 0.97992300  
H -2.08120700 -0.53217900 -1.40309700  
H -1.50572700 0.34455300 1.35573100  
H 0.03780200 -1.32118400 0.59423200  
H 3.35364800 0.43028600 -0.09124400  
H 0.13533600 2.01607500 -0.09165300

### Tautomer 9 (*vacuo*)

Electronic Energy E(B3LYP): -681.02238971  
Zero-point correction= 0.106130 (Hartree/Particle)  
Thermal correction to Energy= 0.114574  
Thermal correction to Enthalpy= 0.115519  
Thermal correction to Gibbs Free Energy= 0.072768

C -2.35935700 -0.50591000 0.17402100  
N -1.14624800 0.20169400 0.04629500

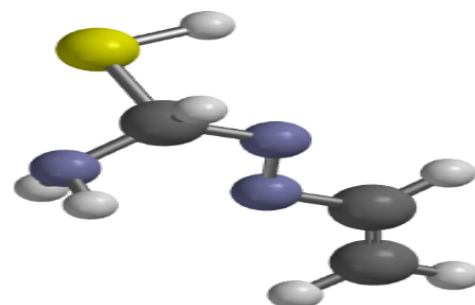

|   |             |             |             |
|---|-------------|-------------|-------------|
| N | -0.20359600 | -0.31258100 | 0.66967200  |
| C | 1.08019800  | 0.42386100  | 0.52554600  |
| S | 2.23213500  | -0.73057400 | -0.36451500 |
| N | 1.11169700  | 1.67385500  | -0.16124300 |
| C | -3.44728000 | -0.05568900 | -0.44509300 |
| H | -2.34353600 | -1.40392300 | 0.78687700  |
| H | 1.45166900  | 0.55348200  | 1.54208800  |
| H | 1.71394000  | -1.86076900 | 0.14861000  |
| H | 0.60759100  | 1.61434900  | -1.04050100 |
| H | 0.68029900  | 2.40424100  | 0.39537600  |
| H | -3.40709100 | 0.84516700  | -1.04469800 |
| H | -4.39135800 | -0.57771700 | -0.36542700 |

### Tautomer 9 (methanol-CPCM)

|                                          |                             |
|------------------------------------------|-----------------------------|
| Electronic Energy E(B3LYP):              | -681.03237468               |
| Zero-point correction=                   | 0.105973 (Hartree/Particle) |
| Thermal correction to Energy=            | 0.114414                    |
| Thermal correction to Enthalpy=          | 0.115358                    |
| Thermal correction to Gibbs Free Energy= | 0.072666                    |

|   |             |             |             |
|---|-------------|-------------|-------------|
| C | -2.36242900 | -0.49661500 | 0.18921100  |
| N | -1.14441000 | 0.19922400  | 0.04442100  |
| N | -0.20310800 | -0.29597000 | 0.68684900  |
| C | 1.08413100  | 0.42869800  | 0.52726900  |
| S | 2.22070200  | -0.74000400 | -0.37380100 |
| N | 1.11733700  | 1.67564800  | -0.16930000 |
| C | -3.44231000 | -0.06549800 | -0.45933500 |
| H | -2.36127700 | -1.36955400 | 0.83683700  |
| H | 1.47198000  | 0.55826400  | 1.53601500  |
| H | 1.78719200  | -1.86944700 | 0.21336600  |
| H | 0.57148700  | 1.62750800  | -1.02480100 |
| H | 0.71989500  | 2.41292300  | 0.40497900  |
| H | -3.39705500 | 0.80999600  | -1.09524700 |
| H | -4.38852900 | -0.58145700 | -0.36698600 |

**Table S4.** Optimized coordinates for ATSC inversion mechanism (4 sequences) at B3LYP/6-311++G(2d,p).

## Ground structure for all sequences

Electronic Energy E(B3LYP): -681.08300316  
Zero-point correction= 0.109444 (Hartree/Particle)  
Thermal correction to Energy= 0.117883  
Thermal correction to Enthalpy= 0.118828  
Thermal correction to Gibbs Free Energy= 0.076108

|   |             |             |             |
|---|-------------|-------------|-------------|
| C | -2.27236900 | -0.55362800 | 0.00005000  |
| H | -2.19704400 | -1.64677400 | 0.00002200  |
| N | -1.22309400 | 0.17002200  | 0.00000600  |
| N | -0.01373200 | -0.45592300 | -0.00007200 |
| H | 0.06409300  | -1.46760900 | 0.00000600  |
| C | 1.16159400  | 0.24214500  | -0.00006400 |
| S | 2.62362300  | -0.57234500 | 0.00002200  |
| N | 1.03610700  | 1.58031100  | -0.00018700 |
| H | 0.12220700  | 2.00726500  | 0.00008700  |
| C | -3.63358600 | 0.05481600  | 0.00013500  |
| H | -3.56771000 | 1.14222700  | 0.00015000  |
| H | -4.20097800 | -0.26672000 | -0.87882500 |
| H | -4.20088500 | -0.26675200 | 0.87914300  |
| H | 1.87354200  | 2.13501300  | 0.00012000  |

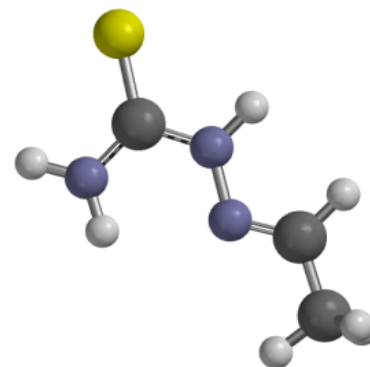

## TS 1 (sequence 1)

Electronic Energy E(B3LYP): -681.02462371  
Zero-point correction= 0.107630 (Hartree/Particle)  
Thermal correction to Energy= 0.115946  
Thermal correction to Enthalpy= 0.116890  
Thermal correction to Gibbs Free Energy= 0.073698

|   |             |             |             |
|---|-------------|-------------|-------------|
| C | -2.38907800 | -0.66727300 | 0.00017500  |
| H | -3.03612000 | -1.55901600 | 0.00040400  |
| N | -1.14550500 | -0.81887300 | 0.00012400  |
| N | 0.14567000  | -0.89070200 | 0.00011800  |
| H | 0.60304100  | -1.79957300 | 0.00026000  |
| C | 1.03953700  | 0.18048400  | -0.00006600 |
| S | 2.67689800  | -0.11776400 | -0.00007300 |
| N | 0.46994800  | 1.39249300  | -0.00022500 |

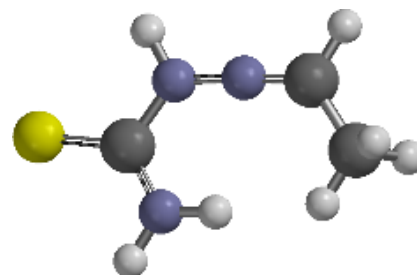

|   |             |            |             |
|---|-------------|------------|-------------|
| H | -0.53346000 | 1.48688000 | -0.00004600 |
| C | -3.16233600 | 0.63396800 | 0.00001400  |
| H | -2.52061900 | 1.51683600 | -0.00083500 |
| H | -3.81324400 | 0.68545000 | -0.87880000 |
| H | -3.81217000 | 0.68632400 | 0.87957700  |
| H | 1.06266500  | 2.20381700 | -0.00024400 |

### GS 1 (sequence 1)

|                                          |                             |
|------------------------------------------|-----------------------------|
| Electronic Energy E(B3LYP):              | -681.08145713               |
| Zero-point correction=                   | 0.109920 (Hartree/Particle) |
| Thermal correction to Energy=            | 0.118230                    |
| Thermal correction to Enthalpy=          | 0.119174                    |
| Thermal correction to Gibbs Free Energy= | 0.076599                    |

|   |             |             |             |
|---|-------------|-------------|-------------|
| C | 2.43701400  | 0.44808400  | 0.00017500  |
| N | 1.21919900  | 0.83941000  | 0.00014700  |
| N | 0.23512000  | -0.09889900 | 0.00004200  |
| H | 0.42333000  | -1.09372500 | -0.00013100 |
| C | -1.08968300 | 0.25534300  | -0.00002600 |
| S | -2.27219000 | -0.92711600 | -0.00030900 |
| N | -1.32915300 | 1.57614900  | 0.00021800  |
| H | -0.56110000 | 2.23083700  | 0.00014400  |
| C | 2.91895600  | -0.97288100 | 0.00011400  |
| H | 2.56532300  | -1.51648800 | 0.88313600  |
| H | 2.56551900  | -1.51635000 | -0.88307300 |
| H | 4.00709000  | -1.00893100 | 0.00022900  |
| H | 3.16546800  | 1.25188000  | 0.00025100  |
| H | -2.28447000 | 1.88673500  | -0.00004400 |

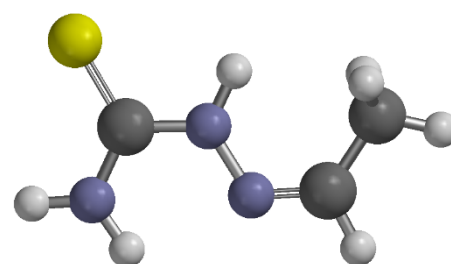

### TS 2 (sequence 1)

|                                          |                             |
|------------------------------------------|-----------------------------|
| Electronic Energy E(B3LYP):              | -681.05320834               |
| Zero-point correction=                   | 0.109421 (Hartree/Particle) |
| Thermal correction to Energy=            | 0.116870                    |
| Thermal correction to Enthalpy=          | 0.117814                    |
| Thermal correction to Gibbs Free Energy= | 0.076953                    |

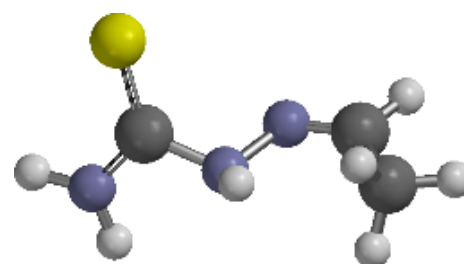

|   |             |             |             |
|---|-------------|-------------|-------------|
| C | 2.22855300  | -0.28903700 | 0.61379800  |
| N | 1.00255300  | -0.03154100 | 0.84848300  |
| N | 0.27590300  | 0.60939200  | -0.14302000 |
| H | 0.60238400  | 0.41865600  | -1.08984600 |
| C | -1.14422100 | 0.34698300  | -0.06238200 |
| S | -1.82873200 | -1.15028800 | -0.13340300 |
| N | -1.82591200 | 1.49824900  | 0.03413800  |
| H | -1.32433100 | 2.36303100  | 0.16606300  |
| C | 2.97690700  | -0.02277900 | -0.66142200 |
| H | 2.51736600  | -0.53538700 | -1.51474300 |
| H | 2.99613900  | 1.04738900  | -0.89378100 |
| H | 4.00560400  | -0.37233300 | -0.58496700 |
| H | 2.75915700  | -0.73985700 | 1.44684700  |
| H | -2.83185000 | 1.47941400  | 0.08771700  |

## GS 2 (sequence 1)

|                                          |                             |
|------------------------------------------|-----------------------------|
| Electronic Energy E(B3LYP):              | -681.06401175               |
| Zero-point correction=                   | 0.109408 (Hartree/Particle) |
| Thermal correction to Energy=            | 0.117791                    |
| Thermal correction to Enthalpy=          | 0.118735                    |
| Thermal correction to Gibbs Free Energy= | 0.075661                    |

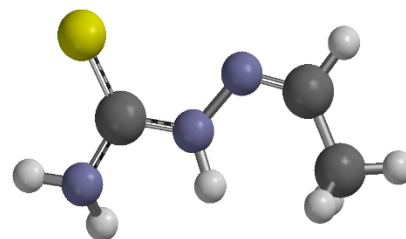

|   |             |             |             |
|---|-------------|-------------|-------------|
| C | -2.24791700 | -0.76416800 | -0.06287800 |
| N | -0.97510000 | -0.81418400 | -0.14567400 |
| N | -0.28596600 | 0.35433900  | -0.07100300 |
| H | -0.78279200 | 1.21508300  | 0.13268200  |
| C | 1.08830300  | 0.38418000  | -0.01127200 |
| S | 2.08372500  | -0.93415200 | 0.06529400  |
| N | 1.56313700  | 1.67605700  | 0.02408900  |
| H | 1.05736100  | 2.39091100  | -0.48317000 |
| C | -3.10187100 | 0.45960200  | 0.12661200  |
| H | -2.85117700 | 0.99074300  | 1.05198700  |
| H | -2.98617000 | 1.16560300  | -0.70369300 |
| H | -4.15435700 | 0.18544700  | 0.18129900  |
| H | -2.73535400 | -1.73027000 | -0.14332100 |
| H | 2.56730200  | 1.73775100  | -0.04714500 |

## Product structure for all sequences (deprotonated)

Electronic Energy E(B3LYP): -680.51622507  
Zero-point correction= 0.096256 (Hartree/Particle)  
Thermal correction to Energy= 0.104213  
Thermal correction to Enthalpy= 0.105157  
Thermal correction to Gibbs Free Energy= 0.062789

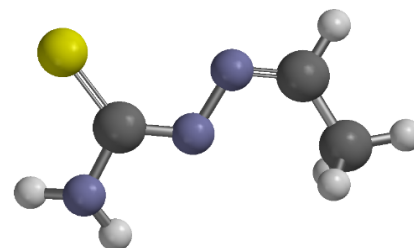

|   |             |             |             |
|---|-------------|-------------|-------------|
| C | 2.23235500  | -0.77087100 | -0.00797900 |
| N | 0.94922100  | -0.79762300 | -0.03414400 |
| N | 0.34062700  | 0.42394500  | -0.02228300 |
| C | -0.98539600 | 0.39878200  | -0.02387900 |
| S | -2.10584000 | -0.90663000 | 0.02284200  |
| N | -1.53016800 | 1.68875100  | -0.08903400 |
| H | -0.89410300 | 2.40362900  | 0.24469400  |
| C | 3.09831300  | 0.46207900  | 0.03288800  |
| H | 2.87780000  | 1.12418600  | -0.81038000 |
| H | 2.90696300  | 1.05070000  | 0.93668200  |
| H | 4.15844000  | 0.19272400  | 0.00726200  |
| H | 2.72065500  | -1.74401500 | -0.01741500 |
| H | -2.46570200 | 1.73341000  | 0.28573600  |

## TS 1 (sequence 2)

Electronic Energy E(B3LYP): -681.05539558  
Zero-point correction= 0.109172 (Hartree/Particle)  
Thermal correction to Energy= 0.116664  
Thermal correction to Enthalpy= 0.117608  
Thermal correction to Gibbs Free Energy= 0.076818

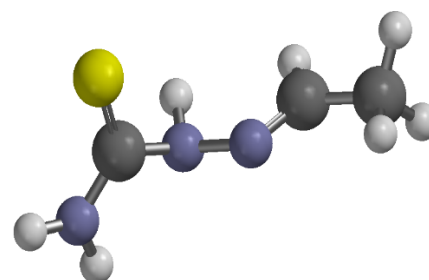

|   |             |             |             |
|---|-------------|-------------|-------------|
| C | -2.15826900 | -0.14166000 | 0.35633100  |
| H | -2.23590800 | -0.34032600 | 1.43353100  |
| N | -1.06400000 | -0.31491300 | -0.26257500 |
| N | 0.00693800  | -0.83508600 | 0.45936200  |
| H | -0.09062700 | -0.68873300 | 1.46621900  |

|   |             |             |             |
|---|-------------|-------------|-------------|
| C | 1.28194700  | -0.30045800 | 0.02903300  |
| S | 1.67932700  | 1.29975200  | 0.02896900  |
| N | 2.10496200  | -1.29522700 | -0.33077200 |
| H | 1.75090000  | -2.23834600 | -0.37611500 |
| C | -3.38354700 | 0.32899300  | -0.35466900 |
| H | -3.16543300 | 0.50803200  | -1.40673500 |
| H | -4.18629300 | -0.41136300 | -0.27802000 |
| H | -3.75706500 | 1.25405500  | 0.09482000  |
| H | 3.03911200  | -1.08401700 | -0.64348000 |

### GS 1 (sequence 2)

Electronic Energy E(B3LYP): -681.06708518  
 Zero-point correction= 0.109134 (Hartree/Particle)  
 Thermal correction to Energy= 0.117499  
 Thermal correction to Enthalpy= 0.118443  
 Thermal correction to Gibbs Free Energy= 0.075815

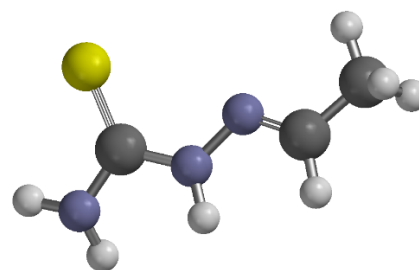

|   |             |             |             |
|---|-------------|-------------|-------------|
| C | -2.23953000 | 0.43077700  | 0.05746500  |
| H | -2.36396400 | 1.50818000  | 0.23489500  |
| N | -1.08565500 | -0.08413300 | -0.08587300 |
| N | -0.01657700 | 0.75637100  | -0.02662200 |
| H | -0.18485600 | 1.73282900  | 0.20453800  |
| C | 1.27590900  | 0.29982200  | -0.00117300 |
| S | 1.74317500  | -1.28908100 | 0.01566100  |
| N | 2.18009400  | 1.33750900  | 0.05310800  |
| H | 1.95188100  | 2.20250000  | -0.42008900 |
| C | -3.47011800 | -0.40938100 | -0.01038900 |
| H | -3.20649800 | -1.45177600 | -0.18338600 |
| H | -4.04016800 | -0.33396200 | 0.92079500  |
| H | -4.12788200 | -0.06774600 | -0.81584800 |
| H | 3.13807300  | 1.03973300  | -0.05118500 |

### TS 2 (sequence 2)

Electronic Energy E(B3LYP): -681.01559417  
 Zero-point correction= 0.107443 (Hartree/Particle)

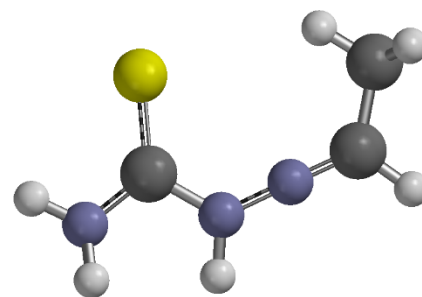

Thermal correction to Energy= 0.115568  
 Thermal correction to Enthalpy= 0.116512  
 Thermal correction to Gibbs Free Energy= 0.074446

|   |             |             |             |
|---|-------------|-------------|-------------|
| N | -2.51453600 | -0.74141200 | 0.00360000  |
| C | -1.27071500 | -0.18355300 | -0.00102500 |
| N | -0.26537900 | -1.15384100 | -0.02347000 |
| N | 0.99464800  | -0.90744800 | -0.02449300 |
| C | 2.22372300  | -0.68407200 | -0.02037100 |
| S | -0.99659700 | 1.44564600  | -0.02440800 |
| H | -3.28033700 | -0.10307900 | 0.14358300  |
| H | 2.93536000  | -1.52683400 | -0.07332600 |
| H | -0.57459400 | -2.12428200 | -0.11105700 |
| H | -2.65123400 | -1.68875800 | 0.32805800  |
| C | 2.86295600  | 0.68092100  | 0.05396600  |
| H | 3.51814800  | 0.83751300  | -0.80976400 |
| H | 2.10462800  | 1.46149900  | 0.08194200  |
| H | 3.49466000  | 0.75272900  | 0.94620700  |

## GS 2 (sequence 2)

Electronic Energy E(B3LYP): -681.06401175  
 Zero-point correction= 0.109408 (Hartree/Particle)  
 Thermal correction to Energy= 0.117791  
 Thermal correction to Enthalpy= 0.118735  
 Thermal correction to Gibbs Free Energy= 0.075661

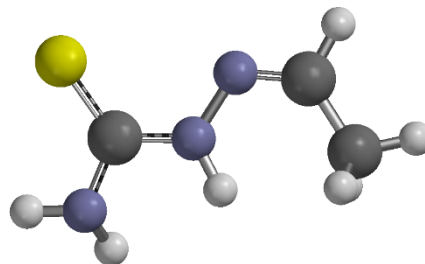

|   |             |             |             |
|---|-------------|-------------|-------------|
| C | -2.24791700 | -0.76416800 | -0.06287800 |
| N | -0.97510000 | -0.81418400 | -0.14567400 |
| N | -0.28596600 | 0.35433900  | -0.07100300 |
| H | -0.78279200 | 1.21508300  | 0.13268200  |
| C | 1.08830300  | 0.38418000  | -0.01127200 |
| S | 2.08372500  | -0.93415200 | 0.06529400  |
| N | 1.56313700  | 1.67605700  | 0.02408900  |
| H | 1.05736100  | 2.39091100  | -0.48317000 |
| C | -3.10187100 | 0.45960200  | 0.12661200  |
| H | -2.85117700 | 0.99074300  | 1.05198700  |
| H | -2.98617000 | 1.16560300  | -0.70369300 |



|   |             |             |             |
|---|-------------|-------------|-------------|
| H | -4.15435700 | 0.18544700  | 0.18129900  |
| H | -2.73535400 | -1.73027000 | -0.14332100 |
| H | 2.56730200  | 1.73775100  | -0.04714500 |

### GS 1 (sequence 3)

|                                          |                             |
|------------------------------------------|-----------------------------|
| Electronic Energy E(B3LYP):              | -680.52168411               |
| Zero-point correction=                   | 0.096135 (Hartree/Particle) |
| Thermal correction to Energy=            | 0.103998                    |
| Thermal correction to Enthalpy=          | 0.104942                    |
| Thermal correction to Gibbs Free Energy= | 0.063551                    |

|   |             |             |             |
|---|-------------|-------------|-------------|
| C | -2.25992500 | -0.57726300 | -0.04043300 |
| H | -2.20819700 | -1.66552500 | -0.15470900 |
| N | -1.17999500 | 0.10535400  | 0.03481200  |
| N | -0.00866400 | -0.61634300 | -0.01323400 |
| C | 1.07301600  | 0.15194600  | -0.02199200 |
| S | 2.66500800  | -0.50622400 | 0.02253300  |
| N | 0.95720700  | 1.53680800  | -0.10370900 |
| H | 0.04890600  | 1.88890600  | 0.17391300  |
| C | -3.60416400 | 0.07898400  | 0.03029200  |
| H | -3.48882700 | 1.15878300  | 0.14257500  |
| H | -4.19798800 | -0.11336700 | -0.87346100 |
| H | -4.19559100 | -0.29588300 | 0.87673300  |
| H | 1.76817400  | 2.02392400  | 0.24213000  |

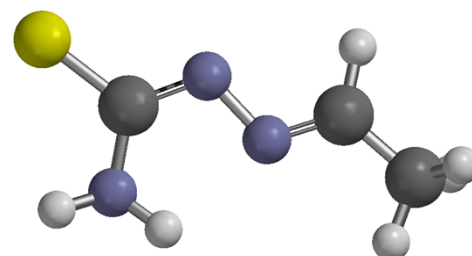

### TS 1 (sequence 3)

|                                          |                             |
|------------------------------------------|-----------------------------|
| Electronic Energy E(B3LYP):              | -680.45898716               |
| Zero-point correction=                   | 0.093321 (Hartree/Particle) |
| Thermal correction to Energy=            | 0.101309                    |
| Thermal correction to Enthalpy=          | 0.102253                    |
| Thermal correction to Gibbs Free Energy= | 0.059620                    |

|   |             |             |             |
|---|-------------|-------------|-------------|
| C | -2.39092300 | -0.39368100 | -0.40750400 |
| H | -2.98171600 | -0.77812700 | -1.27872600 |
| N | -1.16037600 | -0.51231800 | -0.35691700 |

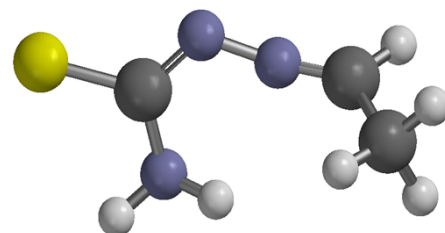

|   |             |             |             |
|---|-------------|-------------|-------------|
| N | 0.09899200  | -0.85365700 | -0.12017400 |
| C | 1.02538300  | 0.06976900  | -0.09263600 |
| S | 2.68900000  | -0.25951600 | 0.26981000  |
| N | 0.67498200  | 1.39546500  | -0.42994900 |
| H | -0.27585700 | 1.63301500  | -0.15728000 |
| C | -3.28057300 | 0.27690500  | 0.64073800  |
| H | -3.78601500 | 1.15419300  | 0.21477000  |
| H | -4.06670400 | -0.41415700 | 0.97170000  |
| H | -2.69326300 | 0.58994800  | 1.50597600  |
| H | 1.36103900  | 2.04299200  | -0.06770300 |

### GS 2 (sequence 3)

Electronic Energy E(B3LYP): -680.52101824  
 Zero-point correction= 0.096379 (Hartree/Particle)  
 Thermal correction to Energy= 0.104250  
 Thermal correction to Enthalpy= 0.105194  
 Thermal correction to Gibbs Free Energy= 0.063287

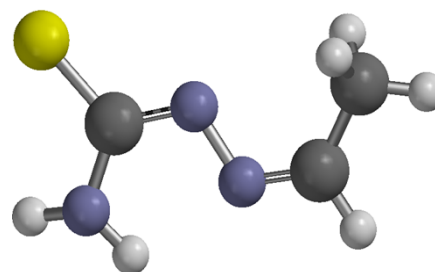

|   |             |             |             |
|---|-------------|-------------|-------------|
| C | -2.42380400 | 0.43414300  | -0.05309500 |
| N | -1.18877600 | 0.79156000  | -0.09059100 |
| N | -0.27316700 | -0.23263500 | -0.03374000 |
| C | 0.98324200  | 0.20350200  | 0.02107200  |
| S | 2.32743200  | -0.87066500 | -0.02291500 |
| C | -2.91747900 | -0.98068500 | 0.07264100  |
| H | -2.52192400 | -1.60371600 | -0.73556500 |
| H | -2.56126000 | -1.44001400 | 1.00041100  |
| H | -4.01062200 | -1.01513000 | 0.05393100  |
| H | -3.15244700 | 1.23983400  | -0.12366800 |
| N | 1.24905300  | 1.55968900  | 0.15215800  |
| H | 2.17195500  | 1.82191500  | -0.15316300 |
| H | 0.47385500  | 2.15569300  | -0.11381200 |

### TS 2 (sequence 3)

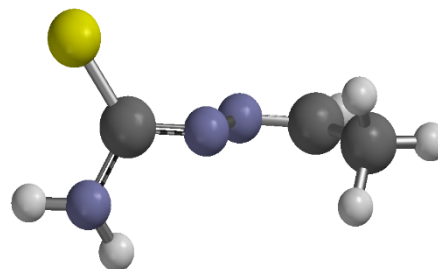

Electronic Energy E(B3LYP): -680.48890439  
 Zero-point correction= 0.094583 (Hartree/Particle)  
 Thermal correction to Energy= 0.102158  
 Thermal correction to Enthalpy= 0.103103  
 Thermal correction to Gibbs Free Energy= 0.062117

|   |             |             |             |
|---|-------------|-------------|-------------|
| C | 2.37445700  | -0.11093800 | 0.63776500  |
| N | 1.10193000  | 0.06115500  | 0.83641000  |
| N | 0.31034700  | 0.10974200  | -0.23546300 |
| C | -1.01255500 | 0.29079800  | -0.10300700 |
| S | -2.20553700 | -0.92989500 | -0.02192700 |
| C | 3.00205600  | -0.26608600 | -0.71551200 |
| H | 2.55091300  | -1.10171000 | -1.26643600 |
| H | 2.83549100  | 0.62215200  | -1.34194100 |
| H | 4.08017200  | -0.43740000 | -0.63522300 |
| H | 2.98860900  | -0.14823300 | 1.53200400  |
| N | -1.43988100 | 1.59726500  | -0.16443200 |
| H | -2.40841000 | 1.77998300  | 0.04688300  |
| H | -0.74870500 | 2.30374000  | 0.04446700  |

### GS 1 (sequence 4)

Electronic Energy E(B3LYP): -680.52168411  
 Zero-point correction= 0.096135 (Hartree/Particle)  
 Thermal correction to Energy= 0.103998  
 Thermal correction to Enthalpy= 0.104942  
 Thermal correction to Gibbs Free Energy= 0.063551

|   |             |             |             |
|---|-------------|-------------|-------------|
| C | -2.25992500 | -0.57726300 | -0.04043300 |
| H | -2.20819700 | -1.66552500 | -0.15470900 |
| N | -1.17999500 | 0.10535400  | 0.03481200  |
| N | -0.00866400 | -0.61634300 | -0.01323400 |
| C | 1.07301600  | 0.15194600  | -0.02199200 |
| S | 2.66500800  | -0.50622400 | 0.02253300  |
| N | 0.95720700  | 1.53680800  | -0.10370900 |
| H | 0.04890600  | 1.88890600  | 0.17391300  |
| C | -3.60416400 | 0.07898400  | 0.03029200  |

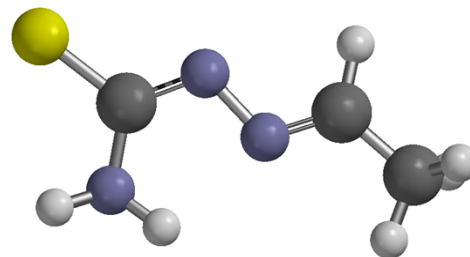

|   |             |             |             |
|---|-------------|-------------|-------------|
| H | -3.48882700 | 1.15878300  | 0.14257500  |
| H | -4.19798800 | -0.11336700 | -0.87346100 |
| H | -4.19559100 | -0.29588300 | 0.87673300  |
| H | 1.76817400  | 2.02392400  | 0.24213000  |

### TS1 (sequence 4)

|                                          |                             |
|------------------------------------------|-----------------------------|
| Electronic Energy E(B3LYP):              | -680.48715798               |
| Zero-point correction=                   | 0.094160 (Hartree/Particle) |
| Thermal correction to Energy=            | 0.101823                    |
| Thermal correction to Enthalpy=          | 0.102767                    |
| Thermal correction to Gibbs Free Energy= | 0.061736                    |

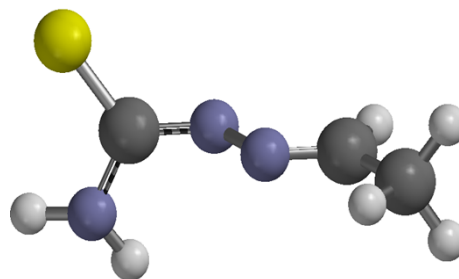

|   |             |             |             |
|---|-------------|-------------|-------------|
| C | 2.32005600  | -0.05924300 | 0.42673300  |
| H | 2.42302400  | 0.01185800  | 1.51515700  |
| N | 1.15605000  | 0.01603100  | -0.13223800 |
| N | 0.07677900  | 0.18507500  | 0.62453200  |
| C | -1.14730500 | 0.29420900  | 0.08817000  |
| S | -2.29745900 | -0.95782500 | -0.09418800 |
| N | -1.53646600 | 1.56788900  | -0.25997800 |
| H | -0.94243900 | 2.31928700  | 0.05701300  |
| C | 3.54522900  | -0.26406400 | -0.41098000 |
| H | 3.25846000  | -0.32665300 | -1.46356500 |
| H | 4.27434600  | 0.55490000  | -0.30792100 |
| H | 4.08421100  | -1.18903500 | -0.15403200 |
| H | -2.52068100 | 1.74646200  | -0.38939300 |

### GS2 (sequence 4)

|                                          |                             |
|------------------------------------------|-----------------------------|
| Electronic Energy E(B3LYP):              | -680.51841358               |
| Zero-point correction=                   | 0.096047 (Hartree/Particle) |
| Thermal correction to Energy=            | 0.104001                    |
| Thermal correction to Enthalpy=          | 0.104945                    |
| Thermal correction to Gibbs Free Energy= | 0.063089                    |

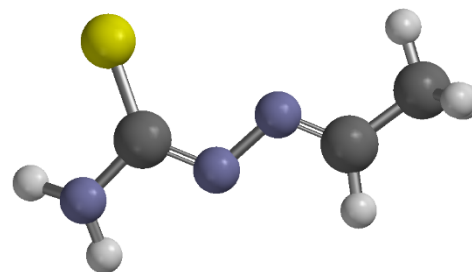

|   |            |            |            |
|---|------------|------------|------------|
| C | 2.22799000 | 0.46250500 | 0.01283500 |
|---|------------|------------|------------|

|   |             |             |             |
|---|-------------|-------------|-------------|
| H | 2.36838300  | 1.55119500  | 0.04601300  |
| N | 1.05309300  | -0.03743900 | -0.01956900 |
| N | 0.02868400  | 0.86551300  | -0.00757400 |
| C | -1.18919500 | 0.35113600  | -0.01932700 |
| S | -1.74634300 | -1.28029200 | 0.00812500  |
| N | -2.17638000 | 1.34747200  | -0.07938200 |
| H | -1.85286600 | 2.24204000  | 0.27077700  |
| C | 3.43965600  | -0.41851700 | 0.00522400  |
| H | 3.13370400  | -1.46518500 | -0.02854800 |
| H | 4.08397400  | -0.21411200 | -0.86049900 |
| H | 4.05887600  | -0.26376100 | 0.89911600  |
| H | -3.05908200 | 1.03493000  | 0.29642400  |

## TS2 (sequence 4)

|                                          |                             |
|------------------------------------------|-----------------------------|
| Electronic Energy E(B3LYP):              | -680.46187143               |
| Zero-point correction=                   | 0.093771 (Hartree/Particle) |
| Thermal correction to Energy=            | 0.101811                    |
| Thermal correction to Enthalpy=          | 0.102694                    |
| Thermal correction to Gibbs Free Energy= | 0.060238                    |

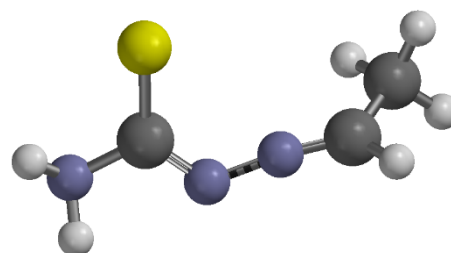

|   |             |             |             |
|---|-------------|-------------|-------------|
| N | 2.37402100  | -1.08853700 | 0.39058700  |
| C | 1.20866300  | -0.33578600 | 0.05257800  |
| N | 0.14456800  | -1.07091300 | -0.10793400 |
| N | -1.02799900 | -0.54208700 | -0.34410700 |
| C | -2.20711900 | -0.22832600 | -0.50927700 |
| S | 1.36579100  | 1.38491100  | -0.07992800 |
| H | 3.19575700  | -0.61695900 | 0.03584600  |
| H | 2.31329800  | -2.03570600 | 0.02989400  |
| C | -3.15306900 | 0.29531800  | 0.56902300  |
| H | -4.06014900 | -0.32226900 | 0.61527700  |
| H | -2.66221900 | 0.29807200  | 1.54303200  |
| H | -3.46860900 | 1.31826700  | 0.32921600  |
| H | -2.69570700 | -0.27645600 | -1.51818100 |

**Table S5.** Optimized coordinates for ATSC tautomerization mechanism at B3LYP/6-311++G(2d,p).

**GS (methanol mediated)**

|                                          |                             |
|------------------------------------------|-----------------------------|
| Electronic Energy E(B3LYP):              | -796.86557160               |
| Zero-point correction=                   | 0.162974 (Hartree/Particle) |
| Thermal correction to Energy=            | 0.175798                    |
| Thermal correction to Enthalpy=          | 0.176742                    |
| Thermal correction to Gibbs Free Energy= | 0.122395                    |

|   |             |             |             |
|---|-------------|-------------|-------------|
| C | 2.36308500  | 0.84906000  | -0.07972300 |
| N | 1.74110400  | -0.25794800 | 0.03660900  |
| N | 0.37624700  | -0.22242800 | -0.04752700 |
| C | -0.34990300 | -1.36500000 | 0.03495600  |
| N | 0.34668800  | -2.49697800 | 0.22581800  |
| S | -2.03558900 | -1.34768400 | -0.09710800 |
| H | -2.08096000 | 0.97180400  | -0.49970000 |
| H | 1.81669200  | 1.78306800  | -0.24304800 |
| H | -0.15691800 | -3.36484600 | 0.27239600  |
| H | 1.35364600  | -2.46714400 | 0.27883200  |
| H | -0.12854000 | 0.65979800  | -0.18901300 |
| O | -1.61719700 | 1.83423100  | -0.51375600 |
| C | -2.22085100 | 2.69597000  | 0.44770500  |
| H | -2.22856600 | 2.24720300  | 1.44648300  |
| H | -1.63290300 | 3.61336700  | 0.47715800  |
| H | -3.24692100 | 2.94976800  | 0.16461800  |
| C | 3.85070000  | 0.90865400  | -0.00227600 |
| H | 4.26811200  | -0.08404400 | 0.16303400  |
| H | 4.26810700  | 1.32103300  | -0.92626500 |
| H | 4.16881700  | 1.56846100  | 0.81101800  |

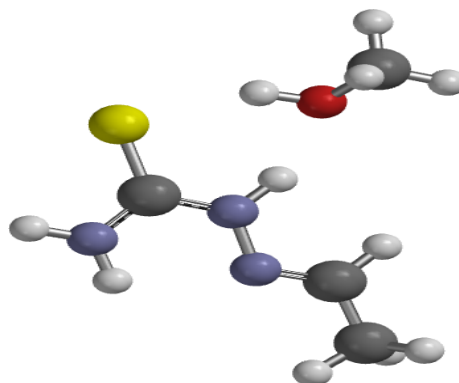

**TS (methanol mediated)**

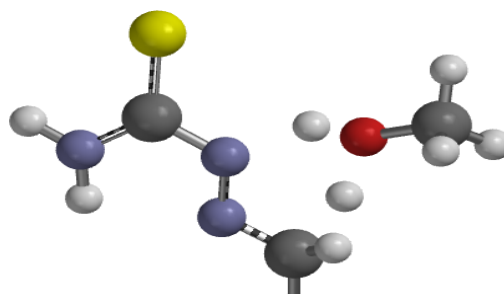

Electronic Energy E(B3LYP): -796.77578167  
 Zero-point correction= 0.156849 (Hartree/Particle)  
 Thermal correction to Energy= 0.168350  
 Thermal correction to Enthalpy= 0.169294  
 Thermal correction to Gibbs Free Energy= 0.118906

|   |             |             |             |
|---|-------------|-------------|-------------|
| C | 1.87616400  | -0.77884600 | 0.30070500  |
| N | 0.58626800  | -1.09962700 | 0.06047500  |
| N | -0.28995800 | -0.18996900 | 0.37681800  |
| C | -1.61244300 | -0.48584400 | 0.05191600  |
| N | -1.90477100 | -1.76002200 | -0.26475600 |
| S | -2.73504700 | 0.74913800  | 0.09127100  |
| H | 1.78429400  | 0.51029600  | -0.42881900 |
| H | 2.05564400  | -0.18742500 | 1.20692800  |
| H | -2.82994800 | -1.97081200 | -0.59742600 |
| H | -1.14506500 | -2.41014100 | -0.41067500 |
| H | 0.36180600  | 1.14727400  | -0.15354600 |
| O | 1.20547100  | 1.53848900  | -0.64490800 |
| C | 1.77065200  | 2.63366900  | 0.10348000  |
| H | 2.72188300  | 2.89272000  | -0.35697900 |
| H | 1.08382000  | 3.47541700  | 0.04163600  |
| H | 1.92038600  | 2.35532000  | 1.14835000  |
| C | 2.93122900  | -1.79795500 | -0.04644500 |
| H | 2.67551400  | -2.31838500 | -0.97040400 |
| H | 3.90257000  | -1.31854500 | -0.18825300 |
| H | 3.05170100  | -2.54864900 | 0.74243800  |

### GS (*vacuo*)

Electronic Energy E(B3LYP): -681.08300316  
 Zero-point correction= 0.109444 (Hartree/Particle)  
 Thermal correction to Energy= 0.117883  
 Thermal correction to Enthalpy= 0.118828

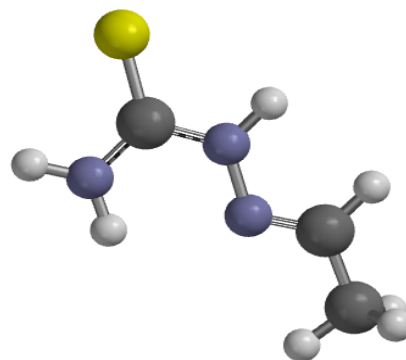

Thermal correction to Gibbs Free Energy= 0.076108

|   |             |             |             |
|---|-------------|-------------|-------------|
| C | -2.27236900 | -0.55362800 | 0.00005000  |
| H | -2.19704400 | -1.64677400 | 0.00002200  |
| N | -1.22309400 | 0.17002200  | 0.00000600  |
| N | -0.01373200 | -0.45592300 | -0.00007200 |
| H | 0.06409300  | -1.46760900 | 0.00000600  |
| C | 1.16159400  | 0.24214500  | -0.00006400 |
| S | 2.62362300  | -0.57234500 | 0.00002200  |
| N | 1.03610700  | 1.58031100  | -0.00018700 |
| H | 0.12220700  | 2.00726500  | 0.00008700  |
| C | -3.63358600 | 0.05481600  | 0.00013500  |
| H | -3.56771000 | 1.14222700  | 0.00015000  |
| H | -4.20097800 | -0.26672000 | -0.87882500 |
| H | -4.20088500 | -0.26675200 | 0.87914300  |
| H | 1.87354200  | 2.13501300  | 0.00012000  |

### TS (*vacuo*)

Electronic Energy E(B3LYP): -680.95664270  
Zero-point correction= 0.102594 (Hartree/Particle)  
Thermal correction to Energy= 0.110798  
Thermal correction to Enthalpy= 0.111742  
Thermal correction to Gibbs Free Energy= 0.069282

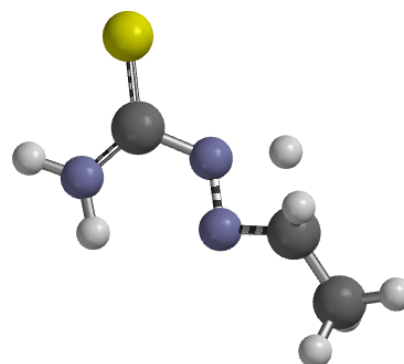

|   |             |             |             |
|---|-------------|-------------|-------------|
| C | -2.13370200 | -0.47243700 | 0.19551900  |
| N | -1.14667300 | 0.47627500  | 0.01145400  |
| N | -0.11183700 | -0.24454100 | -0.29677300 |
| C | 1.18256500  | 0.26769800  | -0.05239200 |
| N | 1.25854700  | 1.60407400  | 0.05211900  |
| S | 2.45911800  | -0.78270200 | 0.02856000  |
| H | -0.98263500 | -1.30169000 | -0.27868000 |
| H | -1.93938900 | -1.03576700 | 1.11110100  |
| H | 2.16310700  | 2.03044400  | 0.16698500  |
| H | 0.41667900  | 2.16048600  | 0.08588600  |
| C | -3.57330200 | -0.13305800 | -0.06369500 |
| H | -4.20081600 | -1.00403900 | 0.13090500  |



|   |             |            |             |
|---|-------------|------------|-------------|
| H | -3.92370700 | 0.67965200 | 0.58263100  |
| H | -3.73274900 | 0.17027400 | -1.09998100 |

**Table S6.** Optimized coordinates for FPTSC tautomerization (catalytic) and inversion mechanism at B3LYP/6-311++G(2d,p).

### GS (inversion)

|                                          |                             |
|------------------------------------------|-----------------------------|
| Electronic Energy E(B3LYP):              | -888.91763952               |
| Zero-point correction=                   | 0.151007 (Hartree/Particle) |
| Thermal correction to Energy=            | 0.162160                    |
| Thermal correction to Enthalpy=          | 0.163104                    |
| Thermal correction to Gibbs Free Energy= | 0.112461                    |

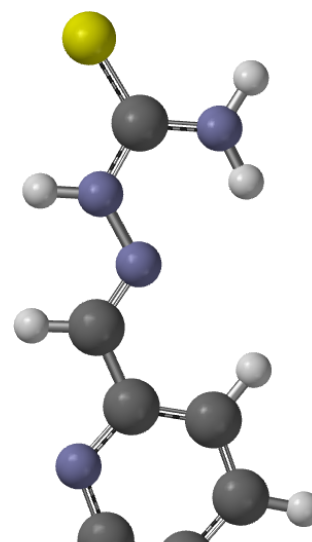

|   |             |             |             |
|---|-------------|-------------|-------------|
| C | -0.41150000 | -0.79569000 | 0.00000900  |
| N | 0.58294000  | 0.01204400  | -0.00000500 |
| N | 1.82460200  | -0.52092500 | -0.00001200 |
| C | 2.95445300  | 0.25497100  | -0.00002500 |
| S | 4.46178500  | -0.46581600 | -0.00003700 |
| H | 1.97225100  | -1.52560000 | -0.00000700 |
| H | -0.28149000 | -1.88049500 | 0.00001400  |
| C | -1.79910700 | -0.33048200 | 0.00001700  |
| C | -2.14900100 | 1.02521500  | 0.00001500  |
| C | -4.00287600 | -0.96728000 | 0.00003600  |
| C | -4.44408200 | 0.35116100  | 0.00003500  |
| H | -4.71534700 | -1.78642200 | 0.00004500  |
| H | -5.50357500 | 0.57376400  | 0.00004200  |
| N | 2.74046000  | 1.58151700  | -0.00002700 |
| H | 1.80103900  | 1.94781200  | -0.00003500 |
| H | 3.53905600  | 2.19106100  | -0.00005300 |
| H | -1.37552100 | 1.78108700  | 0.00000700  |
| C | -3.49065300 | 1.36504500  | 0.00002400  |
| H | -3.79228600 | 2.40579900  | 0.00002300  |
| N | -2.71601400 | -1.31143500 | 0.00002800  |

### TS (inversion)

Electronic Energy E(B3LYP): -888.87125408  
 Zero-point correction= 0.150433 (Hartree/Particle)  
 Thermal correction to Energy= 0.160624  
 Thermal correction to Enthalpy= 0.161568  
 Thermal correction to Gibbs Free Energy= 0.113510

|   |             |             |             |
|---|-------------|-------------|-------------|
| C | 0.53661500  | 1.64150500  | 0.00000000  |
| N | -0.69194500 | 1.37609600  | 0.00000000  |
| N | -1.93318300 | 1.06628100  | -0.00000700 |
| C | -2.46875800 | -0.23839400 | 0.00000200  |
| S | -4.12809600 | -0.39962200 | -0.00000300 |
| H | -2.64907300 | 1.79157100  | -0.00001000 |

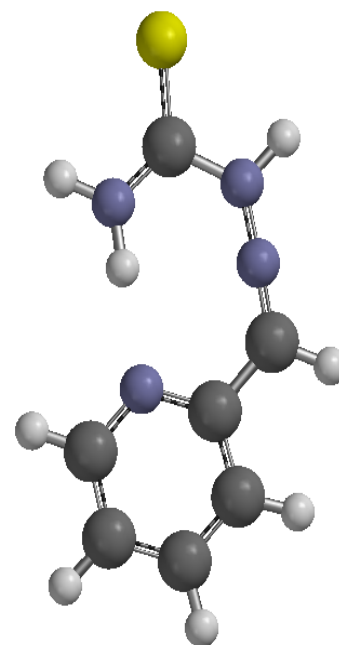

|   |             |             |             |
|---|-------------|-------------|-------------|
| H | 0.88219200  | 2.68555200  | 0.00000200  |
| C | 1.63360200  | 0.64380700  | 0.00000100  |
| C | 2.96124300  | 1.08257500  | 0.00000500  |
| C | 2.31548900  | -1.55295000 | -0.00000700 |
| C | 3.66125900  | -1.20285900 | -0.00000400 |
| H | 2.02132600  | -2.59823600 | -0.00001400 |
| H | 4.42543900  | -1.96916300 | -0.00000400 |
| N | -1.57065400 | -1.21768200 | 0.00001700  |
| H | -0.55628400 | -1.03448700 | 0.00000900  |
| H | -1.92134700 | -2.16036200 | 0.00000500  |
| H | 3.17444700  | 2.14489000  | 0.00000800  |
| C | 3.98548700  | 0.14862800  | 0.00000300  |
| H | 5.02092100  | 0.46820100  | 0.00000700  |
| N | 1.32468000  | -0.66296600 | -0.00000400 |

## GS (tautomerization)

Electronic Energy E(B3LYP): -888.88245958  
 Zero-point correction= 0.150303 (Hartree/Particle)  
 Thermal correction to Energy= 0.161695  
 Thermal correction to Enthalpy= 0.162639  
 Thermal correction to Gibbs Free Energy= 0.110208

|   |             |             |             |
|---|-------------|-------------|-------------|
| C | -0.37567500 | -0.99926500 | 0.00053700  |
| N | 0.65593700  | -0.14302300 | 0.00046500  |
| N | 1.82469000  | -0.68962400 | 0.00035800  |
| C | 2.88608700  | 0.21825200  | 0.00039800  |
| S | 4.44446200  | -0.37433500 | -0.00119300 |
| H | -0.19737000 | -2.07001900 | 0.00079200  |
| C | -1.67891800 | -0.50908400 | 0.00016500  |
| C | -2.84382400 | -1.32977500 | 0.00052000  |
| C | -3.14554300 | 1.41317600  | -0.00094400 |
| C | -4.26149700 | 0.63522600  | -0.00054600 |

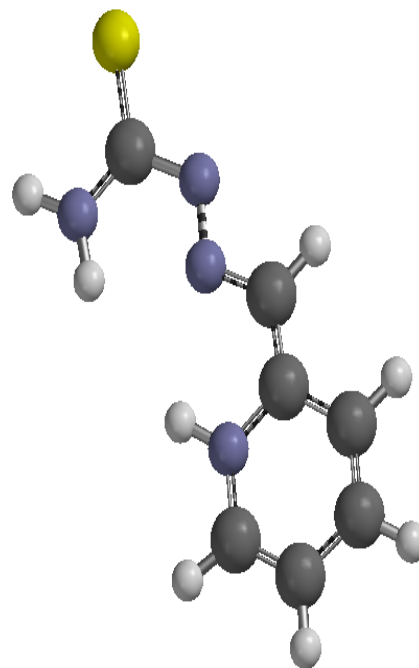

|   |             |             |             |
|---|-------------|-------------|-------------|
| H | -3.17264300 | 2.49415100  | -0.00154900 |
| H | -5.24164600 | 1.08816600  | -0.00080500 |
| N | 2.61299600  | 1.54110700  | 0.00166300  |
| H | 1.65533500  | 1.85184500  | 0.00305200  |
| H | 3.37517200  | 2.19558200  | 0.00213700  |
| H | -2.70647100 | -2.40273800 | 0.00110200  |
| C | -4.09079200 | -0.77666800 | 0.00018400  |
| H | -4.96302400 | -1.41888600 | 0.00049600  |
| N | -1.91088000 | 0.85040400  | -0.00062400 |
| H | -1.07897300 | 1.42804600  | -0.00105000 |

### TS (tautomerization)

Electronic Energy E(B3LYP): -888.84465737  
 Zero-point correction= 0.148424 (Hartree/Particle)  
 Thermal correction to Energy= 0.159488  
 Thermal correction to Enthalpy= 0.160432  
 Thermal correction to Gibbs Free Energy= 0.109885

|   |             |             |             |
|---|-------------|-------------|-------------|
| C | 0.45028700  | -1.55132400 | 0.22557800  |
| N | -0.84304600 | -1.01350300 | 0.55197800  |
| N | -1.56011900 | -0.77051600 | -0.42955400 |
| C | -2.79637200 | -0.11612200 | -0.13754800 |
| S | -2.82303400 | 1.52173300  | 0.06128900  |
| H | 0.43550200  | 1.04715800  | 0.23497000  |
| H | 0.54687100  | -2.62615900 | 0.26590100  |
| C | 1.51566400  | -0.72633700 | 0.10249500  |
| C | 2.87927000  | -1.18121900 | -0.07212400 |
| C | 2.41183600  | 1.54277000  | 0.02687300  |
| C | 3.68252200  | 1.10949400  | -0.13171200 |
| H | 2.14356300  | 2.58971800  | 0.07137000  |
| H | 4.49474300  | 1.81517700  | -0.22066900 |

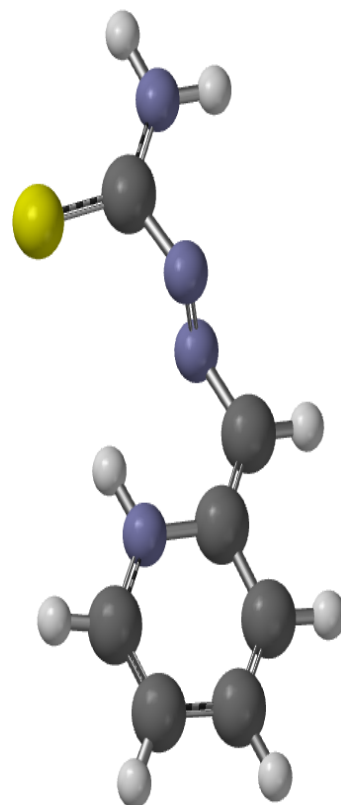

|   |             |             |             |
|---|-------------|-------------|-------------|
| N | -3.84980800 | -0.93751500 | -0.17878200 |
| H | -3.73070700 | -1.92543600 | -0.34507100 |
| H | -4.77936400 | -0.55316000 | -0.11906500 |
| H | 3.04617700  | -2.25000800 | -0.10807700 |
| C | 3.90656300  | -0.30951800 | -0.18299800 |
| H | 4.91547700  | -0.68366200 | -0.31057800 |
| N | 1.36692400  | 0.66898800  | 0.13738800  |

**Table S7.** Optimized coordinates for ODCTSC metals at B3LYP/BS1.

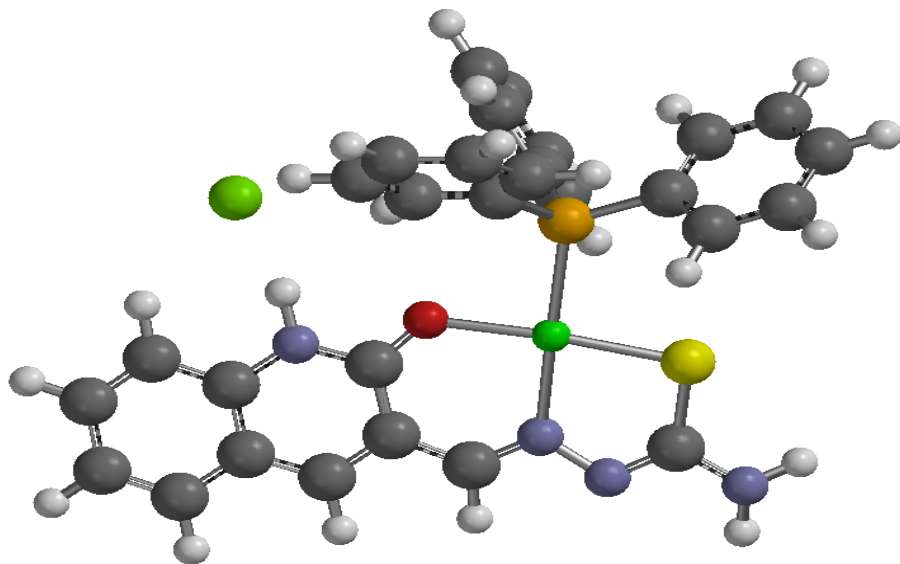

**ODCTSC E Isomer (H substituted)**

Electronic Energy E(B3LYP): -2740.35883527

Zero-point correction= 0.471960 (Hartree/Particle)  
 Thermal correction to Energy= 0.506711  
 Thermal correction to Enthalpy= 0.507655  
 Thermal correction to Gibbs Free Energy= 0.401004

|    |             |             |             |
|----|-------------|-------------|-------------|
| C  | -4.23599000 | 2.10796500  | -0.11665700 |
| C  | -4.75236800 | -0.25711300 | -0.04525300 |
| C  | -2.43018800 | 0.46171100  | -0.04728800 |
| C  | -2.87561700 | 1.85198000  | -0.08731400 |
| C  | -5.21213700 | 1.08481300  | -0.10177800 |
| C  | -1.99569600 | 2.99812300  | -0.07987700 |
| N  | -0.69779500 | 3.00962700  | -0.04924100 |
| N  | -0.12718100 | 4.25860400  | -0.01390200 |
| C  | 1.18063800  | 4.25167000  | 0.01935100  |
| S  | 2.21472000  | 2.81186400  | 0.02695600  |
| N  | 1.82517000  | 5.45169200  | 0.00174700  |
| O  | -1.22481200 | 0.06441000  | -0.03336300 |
| H  | -4.57240800 | 3.14176700  | -0.14808500 |
| H  | -2.47847000 | 3.97535000  | -0.08975400 |
| H  | 2.78943600  | 5.48785100  | 0.29937400  |
| Pd | 0.47607700  | 1.29383500  | -0.04930800 |
| P  | 1.84234600  | -0.63686500 | -0.03054400 |
| C  | 3.65727300  | -0.36324600 | -0.12425200 |
| C  | 4.53107000  | -0.96215000 | 0.79595300  |
| C  | 4.18724800  | 0.44405100  | -1.14613200 |
| C  | 5.90873000  | -0.75938300 | 0.69253200  |
| H  | 4.14144100  | -1.58683400 | 1.59238400  |
| C  | 5.56543100  | 0.63509800  | -1.25057700 |
| H  | 3.52586800  | 0.92637500  | -1.85931200 |
| C  | 6.42857100  | 0.03588500  | -0.33008200 |
| H  | 6.57391500  | -1.22704900 | 1.41288100  |
| H  | 5.96149000  | 1.25835800  | -2.04713000 |
| H  | 7.50095200  | 0.19086300  | -0.40856000 |
| C  | 1.54599000  | -1.52890800 | 1.54146700  |
| C  | 1.53090300  | -2.93081900 | 1.61030200  |
| C  | 1.35888600  | -0.77834500 | 2.71496700  |
| C  | 1.32944000  | -3.56890700 | 2.83524100  |
| H  | 1.66226200  | -3.52486400 | 0.71238100  |

|    |             |             |             |
|----|-------------|-------------|-------------|
| C  | 1.16431100  | -1.42201000 | 3.93680200  |
| H  | 1.36109400  | 0.30741600  | 2.67202000  |
| C  | 1.14632800  | -2.81769800 | 3.99774300  |
| H  | 1.30791800  | -4.65386800 | 2.87639800  |
| H  | 1.01732300  | -0.83324000 | 4.83770800  |
| H  | 0.98320800  | -3.31834100 | 4.94792600  |
| C  | 1.43490900  | -1.79496800 | -1.39395200 |
| C  | 2.33434400  | -2.04953600 | -2.44306900 |
| C  | 0.17670100  | -2.42291600 | -1.39731600 |
| C  | 1.97542100  | -2.91222600 | -3.47975700 |
| H  | 3.31525700  | -1.58835200 | -2.45409200 |
| C  | -0.16890200 | -3.29217900 | -2.43196100 |
| H  | -0.53872100 | -2.26376400 | -0.59874000 |
| C  | 0.72466900  | -3.53387800 | -3.47768300 |
| H  | 2.68059300  | -3.10265600 | -4.28420400 |
| H  | -1.14027700 | -3.77599100 | -2.39531800 |
| H  | 0.45175100  | -4.20925000 | -4.28408200 |
| C  | -5.66879700 | -1.32714900 | -0.01580600 |
| C  | -7.02344400 | -1.04574100 | -0.04608900 |
| C  | -7.50039000 | 0.28414900  | -0.10475500 |
| C  | -6.60754400 | 1.33487600  | -0.13140000 |
| H  | -5.28823400 | -2.34322300 | 0.03139100  |
| H  | -7.73448400 | -1.86650800 | -0.02399600 |
| H  | -8.56900900 | 0.47376200  | -0.12758500 |
| H  | -6.95541000 | 2.36330400  | -0.17450500 |
| N  | -3.39601500 | -0.49322000 | -0.02033000 |
| H  | -3.08505200 | -1.50279400 | 0.03432400  |
| Cl | -2.87273400 | -3.52919000 | 0.18000000  |
| H  | 1.26626700  | 6.27354700  | 0.19244700  |

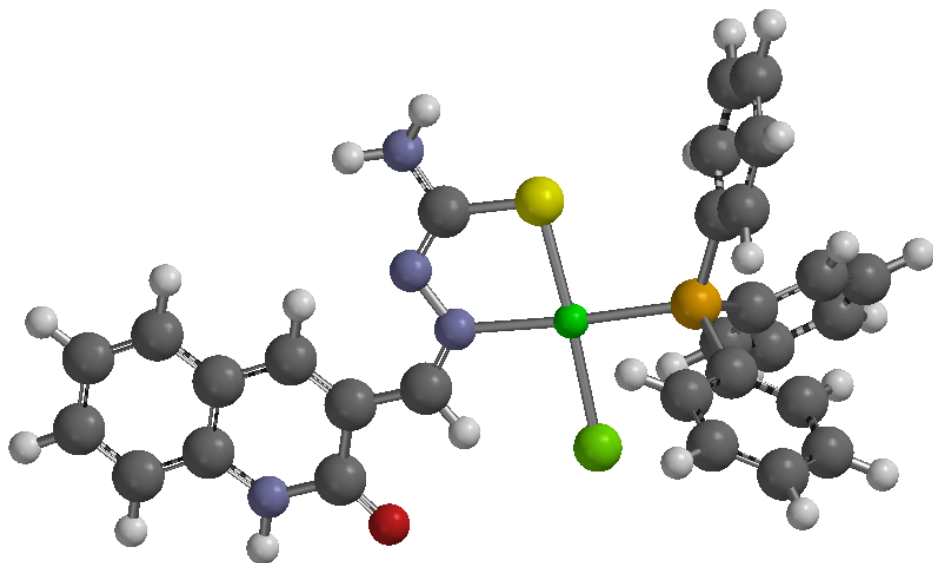

### ODCTSC Z Isomer (H substituted)

Electronic Energy E(B3LYP): -2740.35715990  
 Zero-point correction= 0.472215 (Hartree/Particle)  
 Thermal correction to Energy= 0.507336  
 Thermal correction to Enthalpy= 0.508281  
 Thermal correction to Gibbs Free Energy= 0.399819

|   |             |             |             |
|---|-------------|-------------|-------------|
| C | 4.92035800  | 0.55421000  | -0.03457700 |
| C | 6.92380100  | -0.85119300 | 0.06808700  |
| C | 4.68296000  | -1.90107800 | 0.06933000  |
| C | 4.09018400  | -0.54244000 | -0.00388700 |
| C | 6.34644100  | 0.44150700  | -0.00096400 |
| C | 2.63594800  | -0.55035400 | -0.03157000 |
| N | 1.78334500  | 0.43535600  | -0.07140600 |
| N | 2.27240100  | 1.71583800  | -0.11186100 |
| C | 1.36589600  | 2.65720100  | -0.06440400 |
| S | -0.38229300 | 2.42488500  | 0.03357200  |
| N | 1.79613900  | 3.95237900  | -0.04089500 |
| O | 4.04600100  | -2.95219900 | 0.10629000  |
| H | 4.47458000  | 1.53878500  | -0.08571300 |
| H | 2.18170900  | -1.53417500 | -0.01515700 |
| H | 1.14061400  | 4.67778500  | -0.29412200 |



|    |             |             |             |
|----|-------------|-------------|-------------|
| Pd | -0.34385100 | 0.09795700  | -0.04734700 |
| P  | -2.66939100 | -0.12886300 | 0.02159500  |
| C  | -3.61848500 | 1.44717400  | -0.10810600 |
| C  | -4.32847400 | 1.78899900  | -1.26813000 |
| C  | -3.60602800 | 2.34378400  | 0.97495200  |
| C  | -5.01852500 | 3.00165200  | -1.34083800 |
| H  | -4.35041200 | 1.11132900  | -2.11470700 |
| C  | -4.30052200 | 3.55053200  | 0.89944600  |
| H  | -3.05866500 | 2.09873900  | 1.88028100  |
| C  | -5.00829700 | 3.88274600  | -0.25896000 |
| H  | -5.56729200 | 3.25165600  | -2.24456100 |
| H  | -4.28622000 | 4.23154800  | 1.74568900  |
| H  | -5.54808400 | 4.82387200  | -0.31650800 |
| C  | -3.27995600 | -1.15418900 | -1.37316400 |
| C  | -4.37137900 | -2.02383000 | -1.23908700 |
| C  | -2.64302100 | -1.03434400 | -2.61880700 |
| C  | -4.82244200 | -2.75668700 | -2.33889100 |
| H  | -4.86464300 | -2.14189400 | -0.27994500 |
| C  | -3.10393500 | -1.76039300 | -3.71684800 |
| H  | -1.77843300 | -0.38500800 | -2.72339000 |
| C  | -4.19350000 | -2.62411400 | -3.57814200 |
| H  | -5.66384700 | -3.43410600 | -2.22299100 |
| H  | -2.60311500 | -1.66111000 | -4.67562600 |
| H  | -4.54542000 | -3.19742800 | -4.43128600 |
| C  | -3.29468600 | -0.87378400 | 1.58211300  |
| C  | -4.63101000 | -0.68371000 | 1.97894200  |
| C  | -2.44238900 | -1.64276200 | 2.38940000  |
| C  | -5.10494300 | -1.26284400 | 3.15626400  |
| H  | -5.30018300 | -0.07804500 | 1.37609500  |
| C  | -2.92199000 | -2.21491200 | 3.56951800  |
| H  | -1.41442000 | -1.80359500 | 2.08488500  |
| C  | -4.25060900 | -2.02795400 | 3.95441100  |
| H  | -6.13944400 | -1.11067400 | 3.45116100  |
| H  | -2.25217800 | -2.80645200 | 4.18709700  |
| H  | -4.61960600 | -2.47319700 | 4.87430400  |
| C  | 8.31931100  | -1.00623700 | 0.10431800  |
| C  | 9.13209500  | 0.11895200  | 0.07169800  |

|    |             |             |             |
|----|-------------|-------------|-------------|
| C  | 8.57769000  | 1.41070100  | 0.00284300  |
| C  | 7.20175200  | 1.56491200  | -0.03278200 |
| H  | 8.75079300  | -2.00202100 | 0.15748500  |
| H  | 10.21098100 | -0.00405100 | 0.09985000  |
| H  | 9.22744900  | 2.27991500  | -0.02185500 |
| H  | 6.75725700  | 2.55516100  | -0.08545100 |
| N  | 6.07311100  | -1.93602200 | 0.09845800  |
| H  | 6.46267900  | -2.87123000 | 0.14900400  |
| Cl | -0.19885100 | -2.30691200 | -0.21888700 |
| H  | 2.76060900  | 4.11591200  | -0.29993500 |

### ODCTSC E Isomer (Me substituted)

Electronic Energy E(B3LYP): -2779.6657923  
 Zero-point correction= 0.499770 (Hartree/Particle)  
 Thermal correction to Energy= 0.535575  
 Thermal correction to Enthalpy= 0.536519  
 Thermal correction to Gibbs Free Energy= 0.426909

|    |             |             |             |
|----|-------------|-------------|-------------|
| C  | -4.10536100 | 2.37276600  | -0.11236100 |
| C  | -4.83990700 | 0.06563600  | -0.03956000 |
| C  | -2.46142200 | 0.56696300  | -0.04330900 |
| C  | -2.77414200 | 1.99284500  | -0.08628500 |
| C  | -5.17257300 | 1.44437300  | -0.09352900 |
| C  | -1.79086200 | 3.05139900  | -0.08788800 |
| N  | -0.49540900 | 2.94398900  | -0.05980400 |
| N  | 0.19063700  | 4.12618000  | -0.04508400 |
| C  | 1.50013900  | 3.99839900  | -0.00482200 |
| S  | 2.38566400  | 2.46249500  | 0.01468900  |
| N  | 2.22685800  | 5.13952200  | 0.01865800  |
| O  | -1.29769100 | 0.05889300  | -0.02677000 |
| H  | -4.34461600 | 3.43316700  | -0.14549200 |
| H  | -2.18058700 | 4.06917500  | -0.10488200 |
| H  | 1.68532200  | 5.99335900  | 0.00994600  |
| Pd | 0.50452200  | 1.12356100  | -0.05059800 |
| P  | 1.67703300  | -0.93365500 | -0.02760700 |
| C  | 3.51192400  | -0.84004800 | -0.08131400 |
| C  | 4.30417300  | -1.51025300 | 0.86319700  |

|   |             |             |             |
|---|-------------|-------------|-------------|
| C | 4.13947900  | -0.09647000 | -1.09644500 |
| C | 5.69688800  | -1.43967500 | 0.79051100  |
| H | 3.83923400  | -2.08866200 | 1.65404200  |
| C | 5.53151300  | -0.03794200 | -1.17043800 |
| H | 3.54316600  | 0.43907900  | -1.82874600 |
| C | 6.31290100  | -0.70718600 | -0.22560500 |
| H | 6.29830900  | -1.96148700 | 1.52950400  |
| H | 6.00283600  | 0.53679300  | -1.96253300 |
| H | 7.39667200  | -0.65560200 | -0.28030100 |
| C | 1.26027200  | -1.81294100 | 1.52391300  |
| C | 1.15988700  | -3.21206600 | 1.57950800  |
| C | 1.06695600  | -1.06023600 | 2.69438700  |
| C | 0.86915200  | -3.84492800 | 2.78888800  |
| H | 1.29472200  | -3.80637000 | 0.68210700  |
| C | 0.78215900  | -1.69876900 | 3.90129300  |
| H | 1.13313600  | 0.02366800  | 2.65890000  |
| C | 0.68025800  | -3.09118900 | 3.94912900  |
| H | 0.78239700  | -4.92696900 | 2.81999400  |
| H | 0.63024200  | -1.10795000 | 4.80004000  |
| H | 0.44708300  | -3.58726100 | 4.88701900  |
| C | 1.18581400  | -2.03619300 | -1.41020300 |
| C | 2.07280800  | -2.37249000 | -2.44671400 |
| C | -0.12756000 | -2.53805400 | -1.43764300 |
| C | 1.64779100  | -3.18986700 | -3.49524700 |
| H | 3.09521200  | -2.01217300 | -2.43914700 |
| C | -0.53989700 | -3.36299200 | -2.48399600 |
| H | -0.83605500 | -2.31602100 | -0.64777800 |
| C | 0.34221600  | -3.68536500 | -3.51761600 |
| H | 2.34425500  | -3.44460000 | -4.28944500 |
| H | -1.55412000 | -3.75026700 | -2.46630800 |
| H | 0.01742900  | -4.32629600 | -4.33284900 |
| C | -5.85091900 | -0.91525800 | -0.01048300 |
| C | -7.17406300 | -0.51043600 | -0.03700600 |
| C | -7.52536400 | 0.85800600  | -0.09189100 |
| C | -6.53900600 | 1.82185300  | -0.11945600 |
| H | -5.56494600 | -1.96203800 | 0.03288800  |
| H | -7.95787700 | -1.26200700 | -0.01499500 |

|    |             |             |             |
|----|-------------|-------------|-------------|
| H  | -8.57185100 | 1.14619500  | -0.11180800 |
| H  | -6.79086300 | 2.87806900  | -0.16085600 |
| N  | -3.51073100 | -0.29473800 | -0.01656400 |
| H  | -3.29434600 | -1.32832100 | 0.03229600  |
| Cl | -3.27314800 | -3.37439900 | 0.14360500  |
| C  | 3.67576000  | 5.22849100  | 0.07145000  |
| H  | 3.94848100  | 6.28529800  | 0.07713300  |
| H  | 4.07509900  | 4.75872900  | 0.97776300  |
| H  | 4.13903300  | 4.75229200  | -0.80028700 |

### ODCTSC Z Isomer (Me substituted)

Electronic Energy E(B3LYP): -2779.6661414  
 Zero-point correction= 0.500366 (Hartree/Particle)  
 Thermal correction to Energy= 0.537325  
 Thermal correction to Enthalpy= 0.538269  
 Thermal correction to Gibbs Free Energy= 0.425222

|    |             |             |             |
|----|-------------|-------------|-------------|
| C  | 4.85076800  | 0.32342300  | -0.03382500 |
| C  | 6.81470700  | -1.13735900 | 0.07205600  |
| C  | 4.54522600  | -2.12390800 | 0.08360400  |
| C  | 3.99024000  | -0.74952300 | 0.00494900  |
| C  | 6.27380700  | 0.17044900  | -0.00318900 |
| C  | 2.53703100  | -0.71685200 | -0.02334500 |
| N  | 1.71373700  | 0.29470500  | -0.05090000 |
| N  | 2.23865000  | 1.55952100  | -0.06519100 |
| C  | 1.35458600  | 2.52734400  | -0.01833800 |
| S  | -0.40553800 | 2.33233300  | 0.07141800  |
| N  | 1.80081200  | 3.80507400  | -0.02909800 |
| O  | 3.87933100  | -3.15674400 | 0.12773100  |
| H  | 4.43291900  | 1.31951900  | -0.09044300 |
| H  | 2.05421900  | -1.68680200 | -0.01911300 |
| H  | 1.11058500  | 4.54005900  | -0.00621700 |
| Pd | -0.42120700 | 0.00857400  | -0.03646300 |
| P  | -2.75223300 | -0.16296700 | 0.01811400  |
| C  | -3.66592300 | 1.43678600  | -0.07697100 |
| C  | -4.36588600 | 1.82264600  | -1.22914900 |

|   |             |             |             |
|---|-------------|-------------|-------------|
| C | -3.63724500 | 2.30547900  | 1.02829400  |
| C | -5.03068500 | 3.05076800  | -1.27229200 |
| H | -4.39988400 | 1.16752300  | -2.09284200 |
| C | -4.30661100 | 3.52776700  | 0.98234600  |
| H | -3.09706300 | 2.02619800  | 1.92798500  |
| C | -5.00496600 | 3.90375400  | -0.16840900 |
| H | -5.57199700 | 3.33486600  | -2.17042700 |
| H | -4.28036500 | 4.18662000  | 1.84571400  |
| H | -5.52535700 | 4.85687000  | -0.20290600 |
| C | -3.37519300 | -1.13851500 | -1.40674300 |
| C | -4.47518800 | -2.00093200 | -1.30009500 |
| C | -2.73575700 | -0.98719800 | -2.64780200 |
| C | -4.93191800 | -2.69598500 | -2.42192900 |
| H | -4.97072900 | -2.14289400 | -0.34541400 |
| C | -3.20217100 | -1.67548000 | -3.76762300 |
| H | -1.86522500 | -0.34274100 | -2.73234300 |
| C | -4.30013900 | -2.53251300 | -3.65599000 |
| H | -5.78000800 | -3.36836300 | -2.32728000 |
| H | -2.69936600 | -1.55201900 | -4.72255700 |
| H | -4.65646100 | -3.07653400 | -4.52632200 |
| C | -3.40874200 | -0.92966600 | 1.55538300  |
| C | -4.74809700 | -0.72875800 | 1.93652900  |
| C | -2.57807900 | -1.72271400 | 2.36177600  |
| C | -5.24659400 | -1.32176200 | 3.09665300  |
| H | -5.40038600 | -0.10358800 | 1.33497100  |
| C | -3.08199300 | -2.30833700 | 3.52513500  |
| H | -1.54795900 | -1.89176400 | 2.06940600  |
| C | -4.41368700 | -2.11121800 | 3.89379900  |
| H | -6.28330100 | -1.16133900 | 3.37919800  |
| H | -2.42871400 | -2.91867500 | 4.14215100  |
| H | -4.80175000 | -2.56740800 | 4.80040100  |
| C | 8.20528000  | -1.33191500 | 0.10626400  |
| C | 9.05001900  | -0.23076000 | 0.06519800  |
| C | 8.53214000  | 1.07555100  | -0.01029300 |
| C | 7.16086500  | 1.26851600  | -0.04372400 |
| H | 8.60803200  | -2.33939600 | 0.16428700  |
| H | 10.12502900 | -0.38428400 | 0.09172100  |

|    |             |             |             |
|----|-------------|-------------|-------------|
| H  | 9.20611200  | 1.92595400  | -0.04183600 |
| H  | 6.74471500  | 2.27077300  | -0.10158700 |
| N  | 5.93376500  | -2.19773400 | 0.11019800  |
| H  | 6.29714800  | -3.14321300 | 0.16428800  |
| Cl | -0.33857600 | -2.39873200 | -0.23631600 |
| C  | 3.20725800  | 4.16340400  | -0.08743000 |
| H  | 3.75046900  | 3.76289500  | 0.77623000  |
| H  | 3.67523300  | 3.77474100  | -0.99929100 |
| H  | 3.28576900  | 5.25226400  | -0.08342800 |

**Table S8.** Optimized coordinates for influence of terminal nitrogen substitution (N5-substituents effect study for ODCTSC and MSTSC) at B3LYP/6-311++G(2d,p).

### ODCTSC GS (N5=H)

Electronic Energy E(B3LYP): -1117.87312578  
 Zero-point correction= 0.202525 (Hartree/Particle)  
 Thermal correction to Energy= 0.217430  
 Thermal correction to Enthalpy= 0.218374  
 Thermal correction to Gibbs Free Energy= 0.158683

|   |             |             |             |
|---|-------------|-------------|-------------|
| C | 1.03658200  | 0.95159400  | -0.00062100 |
| N | 1.89716100  | -0.00142100 | -0.00008600 |
| N | 3.20494500  | 0.34214500  | -0.00078500 |
| C | 4.20545500  | -0.59249600 | 0.00020600  |
| S | 5.80520300  | -0.10742500 | -0.00058300 |
| H | 3.49941600  | 1.31409800  | -0.00162300 |
| H | 1.33581200  | 2.00081100  | -0.00132400 |
| C | -0.39600200 | 0.69947100  | -0.00006100 |
| C | -1.25180500 | 1.89829500  | 0.00098800  |

|   |             |             |             |
|---|-------------|-------------|-------------|
| C | -0.96216400 | -0.54001800 | -0.00036400 |
| C | -2.37512500 | -0.74078000 | -0.00006500 |
| H | -0.31715600 | -1.41171700 | -0.00097700 |
| C | -3.21076600 | 0.39831100  | 0.00029600  |
| O | -0.83813700 | 3.05014800  | -0.00020900 |
| N | -2.61447200 | 1.64076400  | 0.00060900  |
| H | -3.19408100 | 2.47026700  | 0.00062800  |
| N | 3.79581300  | -1.87287600 | 0.00161700  |
| H | 2.81204300  | -2.09357000 | 0.00212900  |
| C | -4.60219800 | 0.25375500  | 0.00032700  |
| C | -5.15861100 | -1.01235000 | 0.00007900  |
| H | -6.23650600 | -1.11928100 | 0.00013400  |
| C | -4.34525300 | -2.15344600 | -0.00026900 |
| H | -4.79436200 | -3.13835700 | -0.00050400 |
| C | -2.97247300 | -2.01475900 | -0.00037200 |
| H | -2.33262000 | -2.88980300 | -0.00071300 |
| H | -5.23523100 | 1.13394400  | 0.00059800  |
| H | 4.49456100  | -2.59453600 | 0.00231500  |

## ODCTSC TS (N5=H)

|                                          |                             |
|------------------------------------------|-----------------------------|
| Electronic Energy E(B3LYP):              | -1117.81233834              |
| Zero-point correction=                   | 0.201430 (Hartree/Particle) |
| Thermal correction to Energy=            | 0.215755                    |
| Thermal correction to Enthalpy=          | 0.216699                    |
| Thermal correction to Gibbs Free Energy= | 0.158820                    |

|   |             |             |             |
|---|-------------|-------------|-------------|
| C | -1.02730300 | 1.84680700  | -0.58989300 |
| N | -2.15801200 | 1.29523100  | -0.50856400 |
| N | -3.27885500 | 0.67218600  | -0.38808900 |
| C | -3.48181000 | -0.56596900 | 0.22787900  |
| S | -4.99943800 | -1.24411200 | 0.22504900  |
| H | -4.14322000 | 1.11708700  | -0.69208900 |
| H | -0.94689400 | 2.89282200  | -0.90173500 |
| C | 0.27793100  | 1.20283800  | -0.31053100 |
| C | 1.35215100  | 2.08719200  | 0.17265700  |
| C | 0.54300000  | -0.10815000 | -0.55897600 |
| C | 1.82570100  | -0.70001800 | -0.32072600 |

|   |             |             |             |
|---|-------------|-------------|-------------|
| H | -0.23661900 | -0.73617800 | -0.97827400 |
| C | 2.85625600  | 0.12775500  | 0.17458200  |
| O | 1.22651400  | 3.28450800  | 0.38656800  |
| N | 2.57237200  | 1.45906200  | 0.39104800  |
| H | 3.30043000  | 2.07309700  | 0.73335000  |
| N | -2.38701900 | -1.10015900 | 0.79352400  |
| H | -1.55282100 | -0.54408900 | 0.91238000  |
| C | 4.12691800  | -0.40192200 | 0.42621100  |
| C | 4.37092000  | -1.74126400 | 0.18265300  |
| H | 5.35638700  | -2.14618000 | 0.37816100  |
| C | 3.36147800  | -2.57498600 | -0.31507800 |
| H | 3.56667600  | -3.62080200 | -0.50460700 |
| C | 2.10648000  | -2.05575900 | -0.56350400 |
| H | 1.31729300  | -2.69058800 | -0.95026800 |
| H | 4.91240900  | 0.24071000  | 0.80758600  |
| H | -2.50448700 | -1.93952100 | 1.33508000  |

## ODCTSC GS (N5=Me)

Electronic Energy E(B3LYP): -1157.19087259  
 Zero-point correction= 0.230816 (Hartree/Particle)  
 Thermal correction to Energy= 0.247152  
 Thermal correction to Enthalpy= 0.248097  
 Thermal correction to Gibbs Free Energy= 0.184742

|   |             |             |             |
|---|-------------|-------------|-------------|
| C | -0.66296400 | -1.19577900 | -0.00034600 |
| N | -1.59606500 | -0.31280300 | -0.00015100 |
| N | -2.87262500 | -0.75060100 | -0.00041300 |
| C | -3.94746100 | 0.11044700  | -0.00003700 |
| S | -5.49975900 | -0.51571500 | -0.00034700 |
| H | -3.09576700 | -1.74111900 | -0.00071000 |
| H | -0.87962100 | -2.26484400 | -0.00061100 |
| C | 0.74519700  | -0.83194500 | -0.00018700 |
| C | 1.69288800  | -1.95965500 | 0.00022300  |
| C | 1.21321300  | 0.44785900  | -0.00046200 |
| C | 2.60630900  | 0.75845300  | -0.00027800 |
| H | 0.50253100  | 1.26686800  | -0.00084300 |
| C | 3.52887000  | -0.31125600 | 0.00017300  |



|   |             |             |             |
|---|-------------|-------------|-------------|
| O | 1.37116300  | -3.14064500 | 0.00045900  |
| N | 3.03130400  | -1.59645000 | 0.00039600  |
| H | 3.67382100  | -2.37816000 | 0.00069800  |
| N | -3.63353700 | 1.41334900  | 0.00048800  |
| H | -2.64928200 | 1.63910300  | 0.00067900  |
| C | 4.90474100  | -0.05777400 | 0.00037000  |
| C | 5.36015400  | 1.24807000  | 0.00011300  |
| H | 6.42632600  | 1.43920100  | 0.00026500  |
| C | 4.45960800  | 2.32145900  | -0.00034100 |
| H | 4.82977700  | 3.33867600  | -0.00054200 |
| C | 3.10187600  | 2.07510700  | -0.00053500 |
| H | 2.39526600  | 2.89716400  | -0.00088600 |
| H | 5.60504800  | -0.88547300 | 0.00071800  |
| C | -4.61718400 | 2.48028300  | 0.00093100  |
| H | -5.25577100 | 2.42441800  | -0.88221600 |
| H | -5.25568600 | 2.42377900  | 0.88410100  |
| H | -4.08483400 | 3.43091400  | 0.00124800  |

### ODCTSC TS (N5=Me)

Electronic Energy E(B3LYP): -1157.13088483  
 Zero-point correction= 0.229415 (Hartree/Particle)  
 Thermal correction to Energy= 0.245372  
 Thermal correction to Enthalpy= 0.246316  
 Thermal correction to Gibbs Free Energy= 0.184385

|   |             |             |             |
|---|-------------|-------------|-------------|
| C | -0.76095200 | 2.09523800  | -0.54231900 |
| N | -1.92080200 | 1.59938800  | -0.52994700 |
| N | -3.07246700 | 1.02876200  | -0.48026300 |
| C | -3.35436000 | -0.25101200 | 0.03219100  |
| S | -4.90965800 | -0.83650100 | -0.07689400 |
| H | -3.90813500 | 1.54037200  | -0.75791400 |
| H | -0.61875500 | 3.15695200  | -0.76608200 |
| C | 0.50015100  | 1.35907000  | -0.29009800 |
| C | 1.60428400  | 2.13281000  | 0.30355300  |
| C | 0.70316700  | 0.06366500  | -0.65222800 |
| C | 1.94251100  | -0.62073600 | -0.43136800 |

|   |             |             |             |
|---|-------------|-------------|-------------|
| H | -0.09359200 | -0.47634400 | -1.15426500 |
| C | 2.99816200  | 0.09731700  | 0.17071300  |
| O | 1.53786800  | 3.31146400  | 0.62158400  |
| N | 2.77969100  | 1.41766400  | 0.50072200  |
| H | 3.52744300  | 1.95517900  | 0.92045200  |
| N | -2.31157100 | -0.86876000 | 0.59321000  |
| H | -1.45386900 | -0.34026300 | 0.67271700  |
| C | 4.22806200  | -0.52572300 | 0.41110300  |
| C | 4.40756300  | -1.84886300 | 0.05069600  |
| H | 5.36171600  | -2.32613300 | 0.23810300  |
| C | 3.37307000  | -2.57342600 | -0.55450200 |
| H | 3.52797500  | -3.60718500 | -0.83579900 |
| C | 2.15791500  | -1.96186500 | -0.79186800 |
| H | 1.35049300  | -2.51167500 | -1.26229000 |
| H | 5.03313500  | 0.03291400  | 0.87508600  |
| C | -2.39403100 | -2.17400300 | 1.22474400  |
| H | -3.07581000 | -2.15432800 | 2.07745800  |
| H | -2.75934700 | -2.91885500 | 0.51710200  |
| H | -1.39688300 | -2.45251900 | 1.56329900  |

## ODCTSC GS (N5=Ph)

|                                          |                             |
|------------------------------------------|-----------------------------|
| Electronic Energy E(B3LYP):              | -1348.97783704              |
| Zero-point correction=                   | 0.283503 (Hartree/Particle) |
| Thermal correction to Energy=            | 0.302634                    |
| Thermal correction to Enthalpy=          | 0.303578                    |
| Thermal correction to Gibbs Free Energy= | 0.232479                    |

|   |             |             |             |
|---|-------------|-------------|-------------|
| C | -0.87269500 | -1.82030700 | 0.01115200  |
| N | 0.27492600  | -1.24254500 | -0.00506000 |
| N | 1.37206900  | -2.02795100 | -0.01098200 |
| C | 2.65808400  | -1.52412600 | -0.00892000 |
| S | 3.91874300  | -2.62116800 | 0.00718900  |
| H | 1.30177900  | -3.04111000 | 0.00432500  |
| H | -0.97069900 | -2.90646200 | 0.02951800  |
| C | -2.11790600 | -1.06997900 | 0.00668300  |
| C | -3.34597200 | -1.88043600 | 0.07835600  |

|   |             |             |             |
|---|-------------|-------------|-------------|
| C | -2.20324400 | 0.28833800  | -0.06417400 |
| C | -3.45054800 | 0.98178900  | -0.06771400 |
| H | -1.29017300 | 0.87025800  | -0.12323900 |
| C | -4.63802000 | 0.21979900  | 0.00330300  |
| O | -3.37159300 | -3.10251900 | 0.14027700  |
| N | -4.52577400 | -1.15206000 | 0.07174600  |
| H | -5.36353600 | -1.71739700 | 0.12194100  |
| N | 2.69354500  | -0.17257700 | -0.00964400 |
| H | 1.77076900  | 0.24469100  | 0.04162900  |
| C | -5.88520400 | 0.85346000  | 0.00223400  |
| C | -5.95152300 | 2.23290900  | -0.06956400 |
| H | -6.91938100 | 2.71921400  | -0.07019400 |
| C | -4.78414800 | 3.00465700  | -0.14143100 |
| H | -4.85118000 | 4.08357700  | -0.19746900 |
| C | -3.55228700 | 2.38315500  | -0.14056200 |
| H | -2.64208900 | 2.96915200  | -0.19666000 |
| H | -6.79100500 | 0.26025900  | 0.05723700  |
| C | 3.76190200  | 0.74836200  | 0.00931300  |
| C | 3.43927800  | 2.06085300  | 0.37598300  |
| C | 5.07682200  | 0.44227800  | -0.34588300 |
| C | 4.41141300  | 3.04910500  | 0.39241600  |
| H | 2.41935600  | 2.30222200  | 0.65708900  |
| C | 6.04306300  | 1.44254400  | -0.32061500 |
| H | 5.33572300  | -0.56520300 | -0.62965300 |
| C | 5.72440800  | 2.74467500  | 0.04599700  |
| H | 4.14173000  | 4.05769600  | 0.68203700  |
| H | 7.06041800  | 1.19216400  | -0.59712300 |
| H | 6.48723700  | 3.51324400  | 0.06146300  |

## ODCTSC TS (N5=Ph)

|                                          |                             |
|------------------------------------------|-----------------------------|
| Electronic Energy E(B3LYP):              | -1348.91778746              |
| Zero-point correction=                   | 0.282020 (Hartree/Particle) |
| Thermal correction to Energy=            | 0.300799                    |
| Thermal correction to Enthalpy=          | 0.301743                    |
| Thermal correction to Gibbs Free Energy= | 0.232143                    |

|   |             |             |             |
|---|-------------|-------------|-------------|
| C | -0.58249100 | -2.90125200 | -0.05554800 |
| N | 0.67197200  | -2.84592900 | -0.19254100 |
| N | 1.93990000  | -2.69443000 | -0.34809700 |
| C | 2.68022400  | -1.49551300 | -0.26302000 |
| S | 4.29934900  | -1.57014900 | -0.63153700 |
| H | 2.53501500  | -3.50844400 | -0.49325900 |
| H | -1.07625600 | -3.87265300 | 0.03892400  |
| C | -1.51589100 | -1.75266300 | -0.02223500 |
| C | -2.77056300 | -1.95639300 | 0.72318300  |
| C | -1.31907200 | -0.59254200 | -0.70581700 |
| C | -2.26269900 | 0.48457600  | -0.69766600 |
| H | -0.42427400 | -0.47635300 | -1.30890900 |
| C | -3.45899800 | 0.31292200  | 0.03174700  |
| O | -3.05822400 | -2.97241000 | 1.34009700  |
| N | -3.65067600 | -0.88198100 | 0.69203700  |
| H | -4.50541900 | -1.03017400 | 1.21325400  |
| N | 1.93726900  | -0.45636400 | 0.16269600  |
| H | 1.00430300  | -0.71679800 | 0.46181700  |
| C | -4.41581100 | 1.33330400  | 0.06860400  |
| C | -4.18505400 | 2.51232800  | -0.61678400 |
| H | -4.92876400 | 3.29931100  | -0.58603700 |
| C | -3.00478200 | 2.69763000  | -1.34776300 |
| H | -2.83669100 | 3.62543000  | -1.87940000 |
| C | -2.05845300 | 1.69307000  | -1.38577700 |
| H | -1.13988000 | 1.82612100  | -1.94554100 |
| H | -5.33161100 | 1.19296100  | 0.63168900  |
| C | 2.27464400  | 0.89843400  | 0.38850100  |
| C | 1.49330800  | 1.59580200  | 1.31507400  |
| C | 3.29400000  | 1.56349900  | -0.29347300 |
| C | 1.73308400  | 2.93917300  | 1.56466900  |
| H | 0.70043500  | 1.07901800  | 1.84496600  |
| C | 3.52615700  | 2.90911300  | -0.03127000 |
| H | 3.90111300  | 1.03141700  | -1.00889700 |
| C | 2.75530100  | 3.60363400  | 0.89419600  |
| H | 1.12185200  | 3.46414500  | 2.28869800  |
| H | 4.32186900  | 3.41688900  | -0.56317900 |
| H | 2.94783800  | 4.65099500  | 1.09129200  |

## MSTSC GS (N5=H)

Electronic Energy E(B3LYP): -1062.65802381  
Zero-point correction= 0.199660 (Hartree/Particle)  
Thermal correction to Energy= 0.214243  
Thermal correction to Enthalpy= 0.215187  
Thermal correction to Gibbs Free Energy= 0.156504

|   |             |             |             |
|---|-------------|-------------|-------------|
| C | -2.78097800 | -0.29198700 | -0.02081900 |
| C | -1.43431700 | 2.19211500  | 0.24182600  |
| C | -3.44100200 | 0.84617000  | 0.35049100  |
| C | -1.34403100 | -0.26674900 | -0.29537300 |
| C | -0.69129500 | 1.03200000  | -0.14999100 |
| C | -2.76567000 | 2.09877400  | 0.48398500  |
| C | 0.66822100  | 1.13406400  | -0.39887500 |
| N | 1.42406200  | 0.10238500  | -0.76491600 |
| N | 2.77871800  | 0.26277600  | -0.99029800 |
| C | 3.70188500  | -0.20096500 | -0.06073500 |
| S | 3.31798900  | -0.70749100 | 1.46480800  |
| N | 4.97240400  | -0.19202600 | -0.55787000 |
| H | 5.21253100  | 0.43537700  | -1.31314600 |
| O | -0.72267700 | -1.29773100 | -0.63750500 |
| O | -3.33910700 | -1.51734500 | -0.17290500 |
| C | -4.72685900 | -1.65136900 | 0.07999800  |
| H | -0.91415200 | 3.13826400  | 0.34384700  |
| H | -4.50356900 | 0.81553300  | 0.55314100  |
| H | -3.33547500 | 2.96926700  | 0.78309100  |
| H | 1.18099700  | 2.08555500  | -0.30473000 |
| H | 5.69939800  | -0.37468300 | 0.11547300  |
| H | -5.31835500 | -1.02744200 | -0.59847500 |
| H | -4.96258000 | -2.69904400 | -0.09418900 |
| H | -4.97038800 | -1.39065200 | 1.11529400  |
| H | 0.94681700  | -0.81787300 | -0.78023500 |
| H | 3.02921600  | 0.14190100  | -1.96516300 |

## MSTSC TS (N5=H)

Electronic Energy E(B3LYP): -1062.62239159  
 Zero-point correction= 0.198796 (Hartree/Particle)  
 Thermal correction to Energy= 0.213077  
 Thermal correction to Enthalpy= 0.214021  
 Thermal correction to Gibbs Free Energy= 0.156478

|   |             |             |             |
|---|-------------|-------------|-------------|
| C | -2.98003900 | -0.20853100 | 0.05991300  |
| C | -1.31609600 | 2.05155900  | -0.49181600 |
| C | -3.50076200 | 1.02951700  | -0.12298400 |
| C | -1.52018000 | -0.45573200 | -0.12776500 |
| C | -0.66227100 | 0.78138400  | -0.22426800 |
| C | -2.65617900 | 2.15996000  | -0.43556900 |
| C | 0.67635300  | 0.76515900  | -0.04843500 |
| N | 1.41339700  | -0.36300300 | 0.41208100  |
| N | 2.44750200  | -0.68093700 | -0.49512800 |
| C | 3.75048800  | -0.39459900 | -0.22262700 |
| S | 4.22944200  | 0.56568600  | 1.06166700  |
| N | 4.64195700  | -0.99225200 | -1.06439000 |
| H | 4.34415000  | -1.28429400 | -1.98470000 |
| O | -1.09321100 | -1.58517400 | -0.26878000 |
| O | -3.66642800 | -1.33445700 | 0.33641900  |
| C | -5.07575300 | -1.23544100 | 0.47980800  |
| H | -0.69331200 | 2.91803500  | -0.68092800 |
| H | -4.56791700 | 1.19490300  | -0.05666700 |
| H | -3.13223400 | 3.11867600  | -0.60203600 |
| H | 1.24107000  | 1.68121800  | -0.22946500 |
| H | 5.59656400  | -0.68273500 | -0.97923100 |
| H | -5.54238800 | -0.89287800 | -0.44903300 |
| H | -5.42287600 | -2.23906800 | 0.71360500  |
| H | -5.34328500 | -0.55520900 | 1.29448100  |
| H | 1.87525700  | -0.13678700 | 1.29840400  |
| H | 2.23766500  | -1.52210400 | -1.01772300 |

### MSTSC GS (N5=Me)

Electronic Energy E(B3LYP): -1101.97475346  
 Zero-point correction= 0.227702 (Hartree/Particle)

Thermal correction to Energy= 0.243917  
Thermal correction to Enthalpy= 0.244861  
Thermal correction to Gibbs Free Energy= 0.181965

|   |             |             |             |
|---|-------------|-------------|-------------|
| C | -3.12060000 | -0.28765700 | -0.08467600 |
| C | -1.74690000 | 2.18830200  | 0.09104500  |
| C | -3.77860900 | 0.88007000  | 0.18500500  |
| C | -1.67352000 | -0.29806200 | -0.29736700 |
| C | -1.00635000 | 0.99678600  | -0.19539400 |
| C | -3.08992100 | 2.12892800  | 0.27366400  |
| C | 0.36753100  | 1.06240800  | -0.37065200 |
| N | 1.11762200  | -0.00061500 | -0.64508800 |
| N | 2.49158200  | 0.11084200  | -0.75701300 |
| C | 3.31585100  | -0.21615300 | 0.31057900  |
| S | 2.77099900  | -0.41863400 | 1.86951100  |
| N | 4.62358000  | -0.31661500 | -0.02491200 |
| O | -1.05517100 | -1.35661900 | -0.55307300 |
| O | -3.69125300 | -1.51307500 | -0.18521100 |
| C | -5.08896200 | -1.61378900 | 0.02336700  |
| H | -1.21568700 | 3.13106400  | 0.16313300  |
| H | -4.84967400 | 0.87603500  | 0.33945700  |
| H | -3.65826500 | 3.02394000  | 0.49237800  |
| H | 0.89478800  | 2.00703100  | -0.29095100 |
| H | 5.22908900  | -0.50237800 | 0.75803100  |
| H | -5.64662100 | -1.02956700 | -0.71646000 |
| H | -5.33303000 | -2.66792900 | -0.09002500 |
| H | -5.36682900 | -1.28187800 | 1.02930400  |
| H | 0.61906300  | -0.91031700 | -0.62327100 |
| H | 2.82469200  | -0.09194100 | -1.69006200 |
| C | 5.21257100  | -0.07516600 | -1.33137200 |
| H | 4.88324700  | -0.81128200 | -2.07297200 |
| H | 4.98552500  | 0.92962900  | -1.69954300 |
| H | 6.29307000  | -0.16597300 | -1.24102200 |

## MSTSC TS (N5=Me)

Electronic Energy E(B3LYP): -1101.93976234

Zero-point correction= 0.226809 (Hartree/Particle)  
 Thermal correction to Energy= 0.242722  
 Thermal correction to Enthalpy= 0.243666  
 Thermal correction to Gibbs Free Energy= 0.181928

|   |             |             |             |
|---|-------------|-------------|-------------|
| C | 3.25256200  | -0.25017400 | -0.08044100 |
| C | 1.68102300  | 1.89644100  | 0.96833800  |
| C | 3.82625500  | 0.86182300  | 0.44100100  |
| C | 1.77329700  | -0.43973200 | -0.02833700 |
| C | 0.97810600  | 0.78420100  | 0.35103300  |
| C | 3.02598300  | 1.92726600  | 1.00027400  |
| C | -0.34765700 | 0.90262100  | 0.12195300  |
| N | -1.11632900 | -0.01333800 | -0.65038900 |
| N | -2.21790200 | -0.48059100 | 0.10336000  |
| C | -3.48729800 | -0.06120900 | -0.16237800 |
| S | -3.82111100 | 1.22441100  | -1.19685800 |
| N | -4.46909900 | -0.75240200 | 0.46093500  |
| H | -5.39913700 | -0.42122500 | 0.26509300  |
| O | 1.27993600  | -1.53675100 | -0.20673700 |
| O | 3.89462800  | -1.31013500 | -0.61016900 |
| C | 5.31309800  | -1.27053500 | -0.65982700 |
| H | 1.09440900  | 2.72406700  | 1.34959900  |
| H | 4.90274800  | 0.96733100  | 0.46648700  |
| H | 3.54123300  | 2.77726800  | 1.43092100  |
| H | -0.87315900 | 1.77448800  | 0.51536800  |
| H | 5.74053300  | -1.20909100 | 0.34589900  |
| H | 5.62111100  | -2.20119500 | -1.13048300 |
| H | 5.66451800  | -0.42317600 | -1.25700500 |
| H | -1.52031000 | 0.47359000  | -1.45784400 |
| H | -2.06829900 | -1.42731200 | 0.42482200  |
| C | -4.28106200 | -1.81982500 | 1.42772200  |
| H | -3.65241100 | -1.49828200 | 2.26310000  |
| H | -5.25514300 | -2.10083400 | 1.82287700  |
| H | -3.83736000 | -2.71206400 | 0.97278000  |

**MSTSC GS (N5=Ph)**



Electronic Energy E(B3LYP): -1293.76570936  
 Zero-point correction= 0.280337 (Hartree/Particle)  
 Thermal correction to Energy= 0.299423  
 Thermal correction to Enthalpy= 0.300367  
 Thermal correction to Gibbs Free Energy= 0.229311

|   |             |             |             |
|---|-------------|-------------|-------------|
| C | -4.37683100 | -0.29283200 | 0.48458400  |
| C | -3.12453600 | -0.78549300 | -2.01298500 |
| C | -5.10131500 | -0.60582200 | -0.63189900 |
| C | -2.91791600 | -0.20348400 | 0.42790600  |
| C | -2.31539900 | -0.46309100 | -0.87655000 |
| C | -4.47393700 | -0.85424000 | -1.89147100 |
| C | -0.93763300 | -0.38503500 | -1.00988800 |
| N | -0.12260500 | -0.09455200 | -0.00020200 |
| N | 1.24079300  | 0.01932100  | -0.19855000 |
| C | 1.82474600  | 1.26202800  | -0.35107400 |
| S | 0.97221700  | 2.65334100  | -0.66679700 |
| N | 3.18657900  | 1.26796900  | -0.24383900 |
| O | -2.23712000 | 0.07612900  | 1.44088300  |
| O | -4.88740600 | -0.04264300 | 1.71505900  |
| C | -6.29421000 | -0.09684600 | 1.87363200  |
| H | -2.64066600 | -0.96711700 | -2.96645700 |
| H | -6.18023800 | -0.66978600 | -0.57806300 |
| H | -5.09459300 | -1.09463400 | -2.74523100 |
| H | -0.46055300 | -0.56368200 | -1.96761200 |
| H | 3.56712100  | 2.20298300  | -0.26157300 |
| H | -6.68322800 | -1.09491900 | 1.64546100  |
| H | -6.48655600 | 0.13623600  | 2.91875600  |
| H | -6.79621500 | 0.64020800  | 1.23796200  |
| H | -0.59203100 | 0.16379400  | 0.88799000  |
| H | 1.78035100  | -0.69533300 | 0.27542600  |
| C | 4.08228600  | 0.20431800  | 0.04852600  |
| C | 4.06450500  | -0.99231000 | -0.67303500 |
| C | 5.04438900  | 0.39295200  | 1.04385800  |
| C | 4.98045900  | -1.99546500 | -0.37506700 |
| H | 3.35595900  | -1.12490900 | -1.48047200 |
| C | 5.96964200  | -0.60541100 | 1.31843800  |

|   |            |             |             |
|---|------------|-------------|-------------|
| H | 5.05760500 | 1.32125200  | 1.60305600  |
| C | 5.93547700 | -1.80749500 | 0.61803300  |
| H | 4.95797900 | -2.92006600 | -0.93917300 |
| H | 6.71215300 | -0.44674000 | 2.09106400  |
| H | 6.65193500 | -2.58844300 | 0.84016900  |

## MSTSC TS (N5=Ph)

|                                          |                             |
|------------------------------------------|-----------------------------|
| Electronic Energy E(B3LYP):              | -1293.73019358              |
| Zero-point correction=                   | 0.279595 (Hartree/Particle) |
| Thermal correction to Energy=            | 0.298301                    |
| Thermal correction to Enthalpy=          | 0.299245                    |
| Thermal correction to Gibbs Free Energy= | 0.230038                    |

|   |             |             |             |
|---|-------------|-------------|-------------|
| C | 4.16794600  | -0.66568200 | -0.21564100 |
| C | 3.05549300  | 1.14356800  | 1.70033000  |
| C | 4.91648400  | -0.14301300 | 0.78630400  |
| C | 2.70177500  | -0.39646300 | -0.29031500 |
| C | 2.20002900  | 0.70445000  | 0.61035700  |
| C | 4.33835600  | 0.74340500  | 1.77070500  |
| C | 1.01044900  | 1.31769400  | 0.43191200  |
| N | 0.16977100  | 1.13242400  | -0.70330100 |
| N | -1.12216200 | 0.73163900  | -0.29683400 |
| C | -2.17170700 | 1.59056200  | -0.32275500 |
| S | -1.99167400 | 3.24061900  | -0.59470300 |
| N | -3.41371400 | 1.04994000  | -0.14049100 |
| H | -4.15248600 | 1.71366100  | -0.31992100 |
| O | 1.97627200  | -1.08601200 | -0.98002900 |
| O | 4.59052700  | -1.51314600 | -1.17412100 |
| C | 5.95803200  | -1.89563000 | -1.16726300 |
| H | 2.64947800  | 1.84599300  | 2.41880900  |
| H | 5.96435500  | -0.39466100 | 0.88168800  |
| H | 4.97836200  | 1.10504500  | 2.56637800  |
| H | 0.67460300  | 2.04000700  | 1.17793000  |
| H | 6.21362200  | -2.42481200 | -0.24396400 |
| H | 6.08530300  | -2.56231300 | -2.01684000 |
| H | 6.61263500  | -1.02590200 | -1.28193300 |

|   |             |             |             |
|---|-------------|-------------|-------------|
| H | 0.04565900  | 2.02822100  | -1.18562200 |
| H | -1.28719400 | -0.25405500 | -0.45923400 |
| C | -3.79850800 | -0.29502600 | 0.08680700  |
| C | -4.91810300 | -0.78719700 | -0.58991100 |
| C | -3.13698100 | -1.11530400 | 1.00477100  |
| C | -5.36308400 | -2.08137700 | -0.35814700 |
| H | -5.43147500 | -0.15223900 | -1.30290900 |
| C | -3.57757800 | -2.41771800 | 1.21316200  |
| H | -2.29999100 | -0.73024400 | 1.57185500  |
| C | -4.68922300 | -2.90701400 | 0.53682100  |
| H | -6.23285000 | -2.44904100 | -0.88908800 |
| H | -3.05447900 | -3.04578800 | 1.92412100  |
| H | -5.03069500 | -3.92008400 | 0.70875100  |

\*\*\*\*\*  
\*\*\*\*\*
